# Supplementary material for: HgBrI: a possible tecton for NLO molecular materials?
Source: Royal Society of Chemistry journal article supplement (doi:10.1039/d2dt00201a), 2022-01-01
Supplement: d2dt00201a1.pdf [file d2dt00201a1.pdf]

## ELETTRONIC SUPPLEMENTARY INFORMATION

Title: HgBrI: a possible tecton for NLO molecular materials?

Authors: Alessia Giordana, Emanuele Priola, Stefano Pantaleone, Luca Andreo, Leonardo Mortati, Paola Benzi, Lorenza Operti, Eliano Diana

### INDEX:

|                                            |    |
|--------------------------------------------|----|
| 1. SUPPLEMENTARY FIGURES AND TABLES.....   | 2  |
| 2. DETAILS OF EXPERIMENTAL PROCEDURES..... | 11 |
| 3. CRYSTALLOGRAPHIC TABLES.....            | 13 |

## 1. SUPPLEMENTARY FIGURES AND TABLES

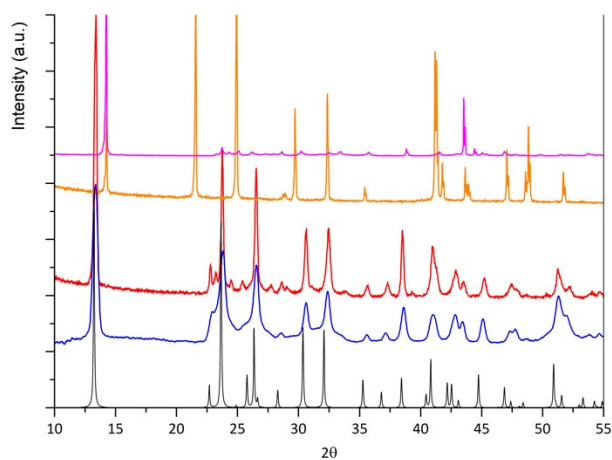

**Figure S1.** Comparison of experimental (in blue from mechano-chemical synthesis, in red sublimated product) and calculated (in red) PXRD pattern of  $\text{HgBrI}$  (**1**) and of the starting reagent  $\text{HgBr}_2$  in pink and  $\text{HgI}_2$  ( $\alpha$ ) in orange.

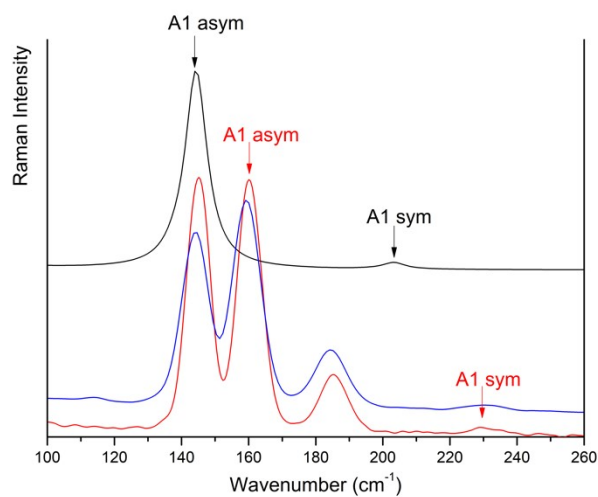

**Figure S2.** Calculated Raman spectrum of  $\text{HgBrI}$  (**1**) in black and experimental spectrum of sublimated product (in red) and of product obtained from mechano-chemical synthesis (in blue).

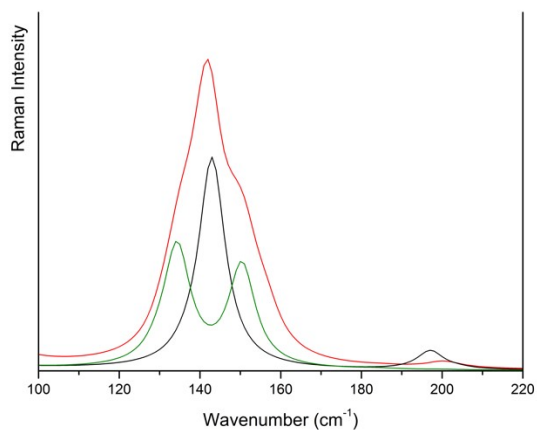

**Figure S3.** Calculated Raman spectra of HgBrI: in black DFT periodic calculation, in red weighted average of ordinated configurations and in green one of the permutations.

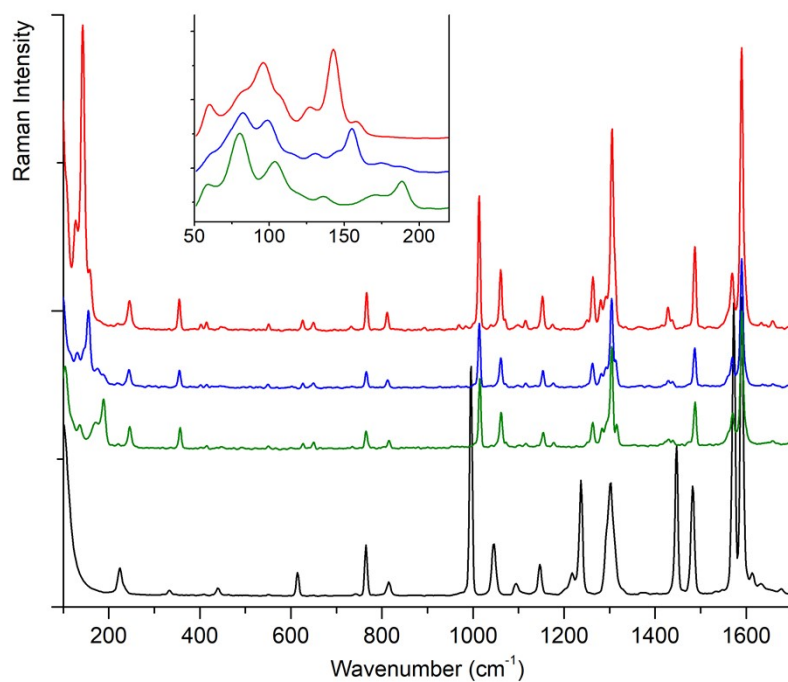

**Figure S4.** Raman spectra of [Hg(bpy)BrI] (**2**) in blue, [Hg(bpy)Br<sub>2</sub>] in green, [Hg(bpy)I<sub>2</sub>] in red and bpy ligand in black, in the inset spectral range 50-220 cm<sup>-1</sup>.

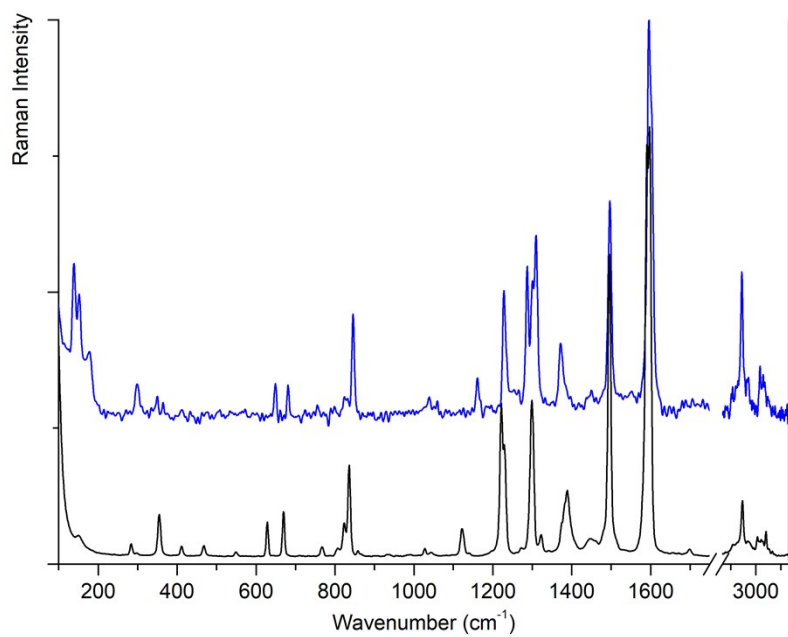

**Figure S5.** Raman spectra of [Hg(dmbpy)BrI] (**3**) in blue and dmbpy ligand in black.

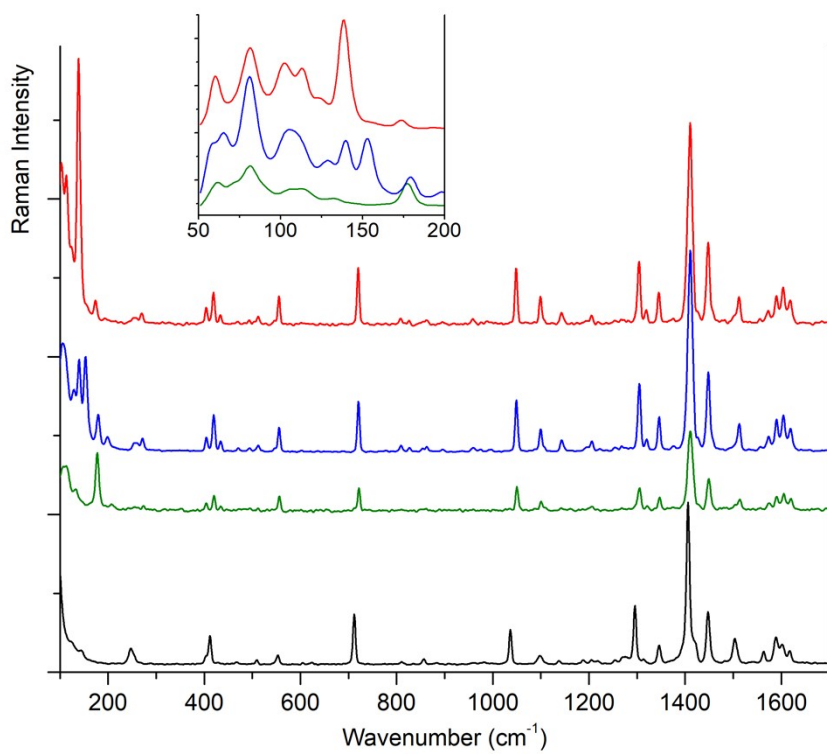

**Figure S6.** Raman spectra of [Hg(phen)BrI] (**4**) in blue, [Hg(phen)Br<sub>2</sub>] (**9**) in green, [Hg(phen)I<sub>2</sub>] in red and phen in black, in the inset spectral range 50-200 cm<sup>-1</sup>.

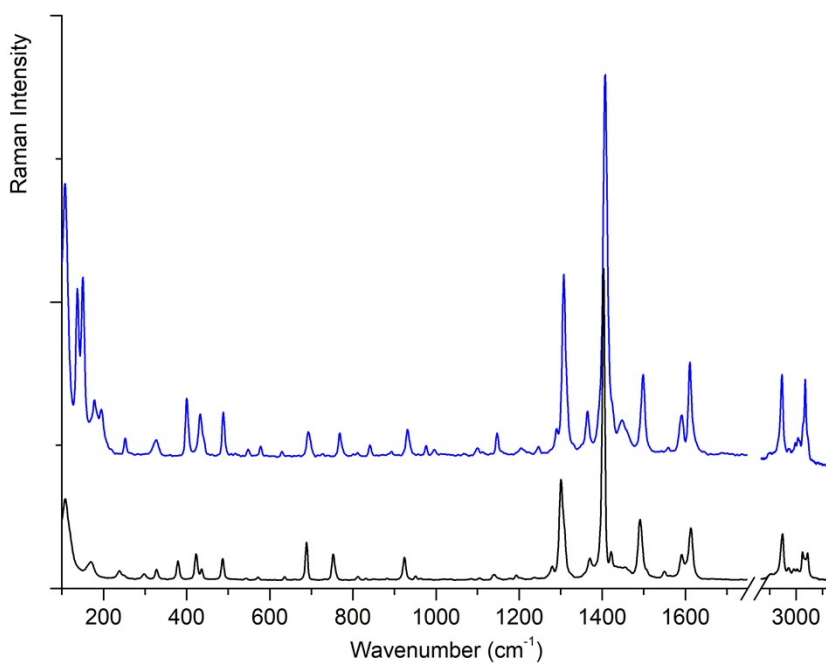

**Figure S7.** Raman spectra of [Hg(dmphen)BrI] (**5**) in blue and dmphen in black.

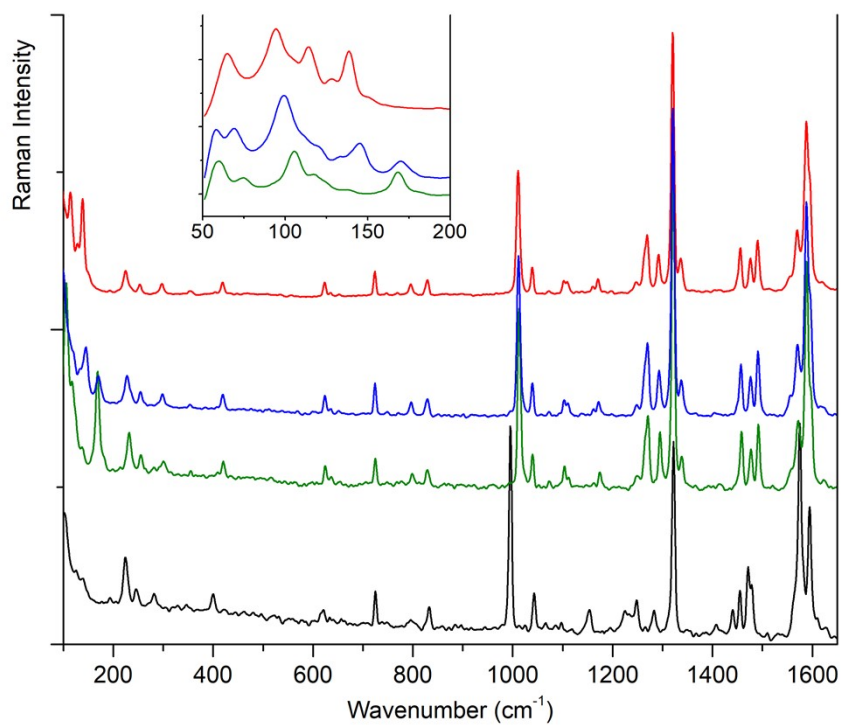

**Figure S8.** Raman spectra of [Hg(terpy)BrI] (**6**) in blue, [Hg(terpy)Br<sub>2</sub>] (**10**) in green, [Hg(phen)I<sub>2</sub>] in red and terpy in black, in the inset spectral range 50-200 cm<sup>-1</sup>.

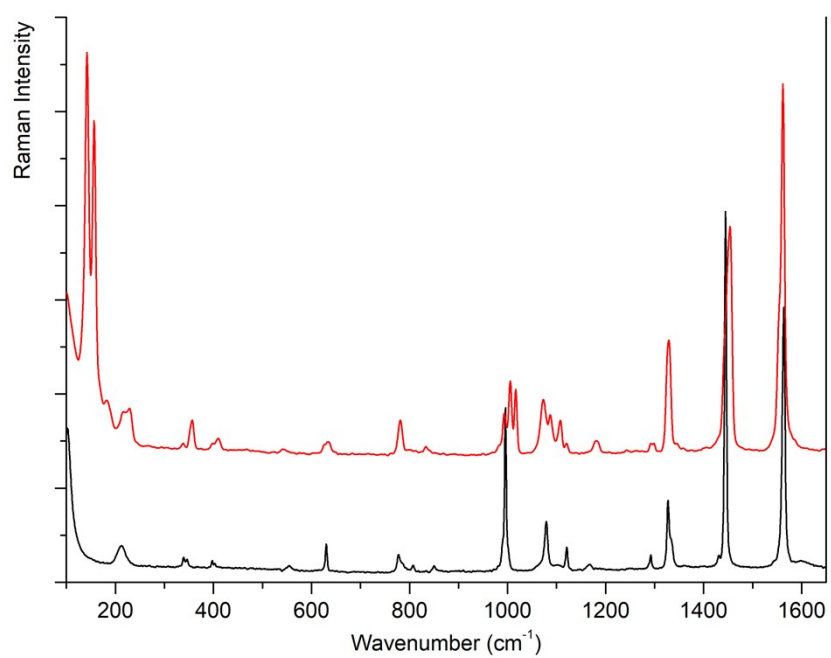

**Figure S9.** Raman spectra of [Hg(bpym)Br] (**7**) in red and bpym in black.

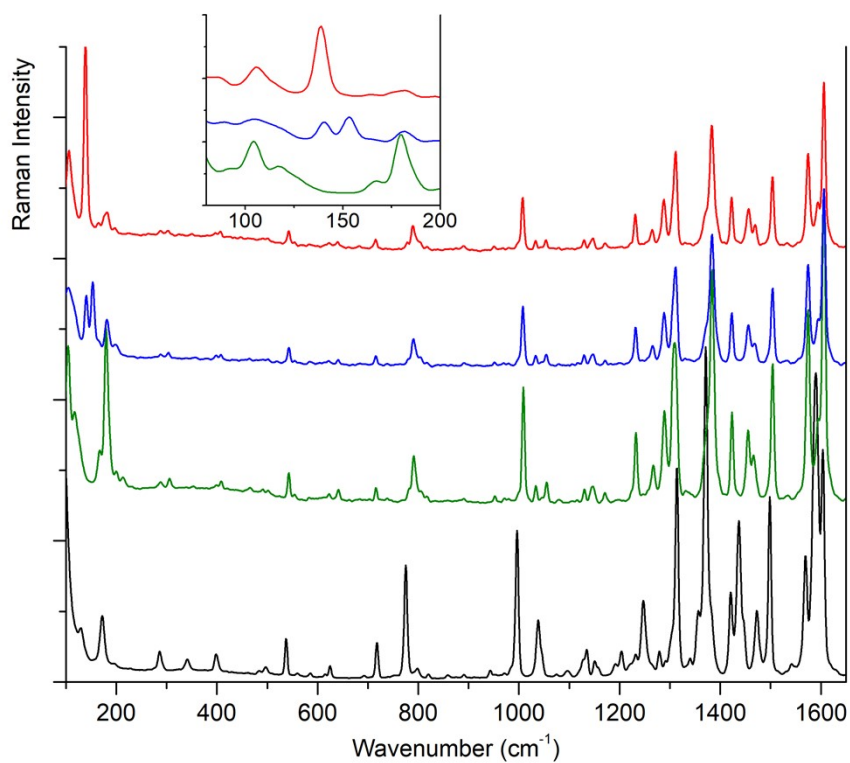

**Figure S10.** Raman spectra of [Hg(pyNP)Br] (**8**) in blue, [Hg(pyNP)Br<sub>2</sub>] in green, [Hg(pyNP)<sub>2</sub>] in red and pyNP in black, in the inset spectral range 80-200 cm<sup>-1</sup>.

**Table S1.** Experimental modes related to Hg coordination in **2-10** compared to corresponding ligand.

| Ligand (L) |                                                | [Hg(L)Br]                                                 | [Hg(L)Br <sub>2</sub> ]                                  | [Hg(L)Br <sub>2</sub> ]                                   | Assignment      |
|------------|------------------------------------------------|-----------------------------------------------------------|----------------------------------------------------------|-----------------------------------------------------------|-----------------|
| bpy        | 1590 vs<br>1573 vs<br>1483 m<br>1447 m         | 1591 vs<br>1570 m<br>1487 m<br>1430 vw                    | 1591 vs<br>1570 m<br>1487 m<br>1430 vw                   | 1591 vs<br>1570 m<br>1487 m<br>1430 vw                    | Ring stretching |
|            | 1045 w<br>995 s                                | 1061 m<br>1014 s                                          | 1063 m<br>1015 s                                         | 1061 m<br>1013 s                                          | Breathing modes |
| dmbpy      | 1598 vs<br>1591 vs<br>1496 s                   | 1602 sh<br>1596 vs<br>1499 s                              | ---                                                      | ---                                                       | Ring stretching |
|            | 1035 vw<br>836 m                               | 1040 vw<br>846 m                                          | ---                                                      | ---                                                       | Breathing modes |
| phen       | 1618 w<br>1602 m<br>1589 m<br>1564 w           | 1620 w<br>1605 m<br>1590 m<br>1574 w                      | 1620 w<br>1605 m<br>1590 m<br>1574 w                     | 1620 w<br>1605 m<br>1590 m<br>1574 w                      | Ring stretching |
|            | 1037 m<br>712 s                                | 1049 s<br>720 s                                           | 1050 s<br>720 s                                          | 1048 s<br>720 s                                           | Breathing modes |
| dmphen     | 1616 m<br>1592 w<br>1550 vw<br>1491 m          | 1612 m<br>1591 w<br>1560 vw<br>1499 m                     | ---                                                      | ---                                                       | Ring stretching |
|            | 963 vw<br>951 w<br>924 m<br>753 m              | 997 vw<br>976 w<br>932 m<br>768 m                         | ---                                                      | ---                                                       | Breathing modes |
| terpy      | 1595 s<br>1575 vs<br>1479 m<br>1471 m          | 1596 sh<br>1588 s<br>1570 m<br>1490 m<br>1476 m           | 1596 sh<br>1588 s<br>1572 m<br>1490 m<br>1476 m          | 1596 sh<br>1588 s<br>1570 m<br>1490 m<br>1476 m           | Ring stretching |
|            | 1045 m<br>995 vs                               | 1039 w<br>1012 s                                          | 1039 w<br>1013 s                                         | 1039 w<br>1011 s                                          | Breathing modes |
| pyNP       | 1604 s<br>1590 vs<br>1569 m<br>1540 vw         | 1608 vs<br>1596 w<br>1575 m<br>1532 vw                    | 1606 vs<br>1595 vw<br>1575 s<br>1535 vw                  | 1606 vs<br>1595 w<br>1575 m<br>1533 vw                    | Ring stretching |
|            | 1075 vw<br>1047 sh<br>1038 w<br>997 m<br>775 m | 1053 vw<br>1034 w<br>1008 m<br>1000 sh<br>791 w<br>781 sh | 1056 w<br>1034 w<br>1009 m<br>1007 sh<br>792 w<br>783 sh | 1054 vw<br>1032 vw<br>1008 m<br>998 sh<br>790 w<br>778 vw | Breathing modes |
| bpym       | 1564 s<br>1445 vs                              | 1562 vs<br>1555 sh<br>1454 s<br>1443 sh                   | ---                                                      | ----                                                      | Ring stretching |
|            | 1120 vw<br>1080 w<br>995 m                     | 1009 w<br>1089 m<br>1073 m<br>1017 m<br>1006 m<br>993 w   | ---                                                      | ----                                                      | Breathing modes |

s = strong, m = medium, w = weak, sh=shoulder, v=very

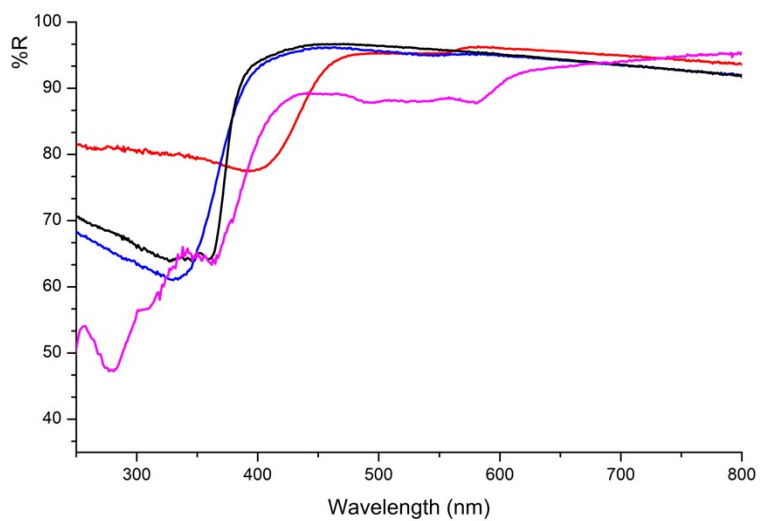

Figure S11. Reflectance spectra of HgBrI (1) in red, [Hg(bpy)BrI] (2) in blue, [Hg(phen)BrI] (4) in black and [Hg(pyNP)BrI] (8) in pink.

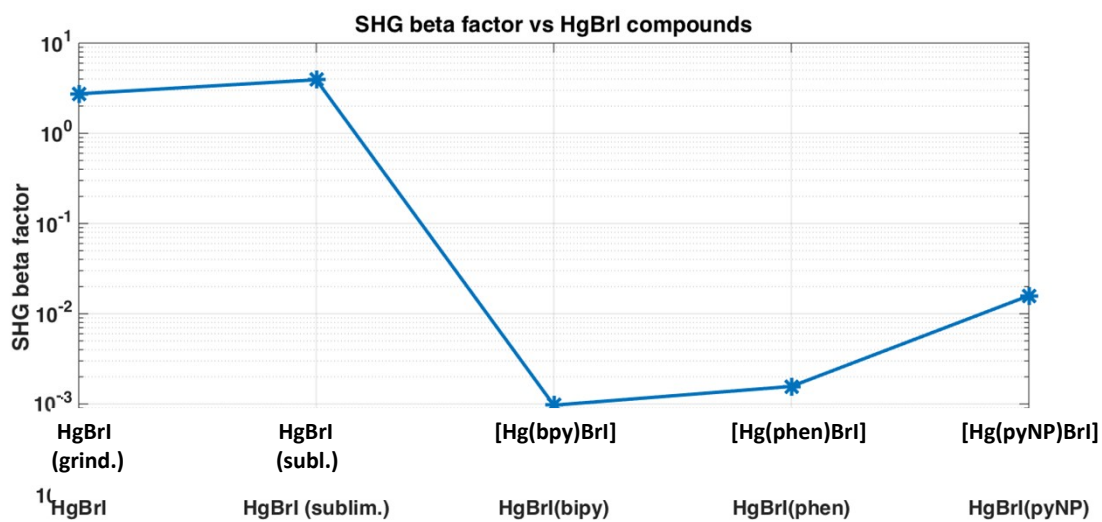

Figure S12. SHG  $\beta$  factor of HgBrI (1) (powder from mechano-chemical synthesis and sublimated product), [Hg(bpy)BrI] (2), [Hg(phen)BrI] (4) and [Hg(pyNP)BrI] (8).



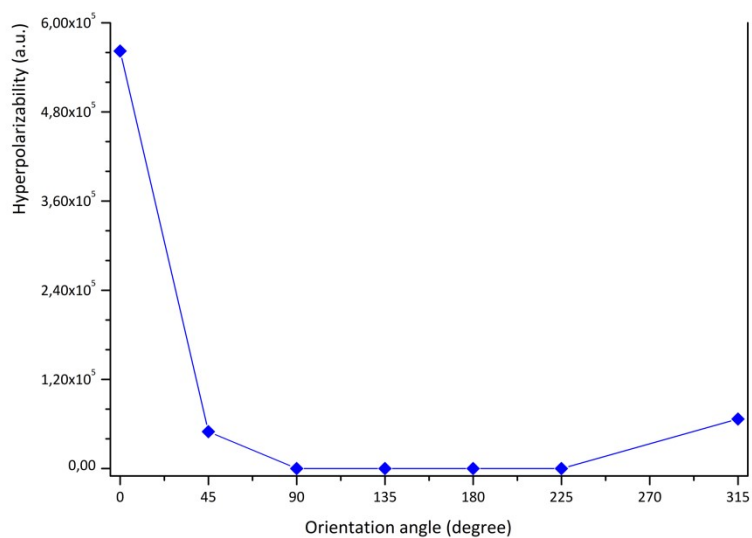

**Figure S13.** Intensity of SHG emission of a single crystal of [Hg(bpy)BrI] (**2**) oriented along seven angles.

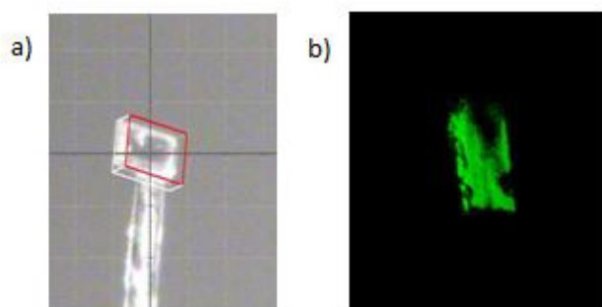

**Image S1.** (a) Photo of the indexed crystal of [Hg(bpy)BrI] (**2**) and (b) SHG Microscopy image of the same crystal along the angle of maximum emission.

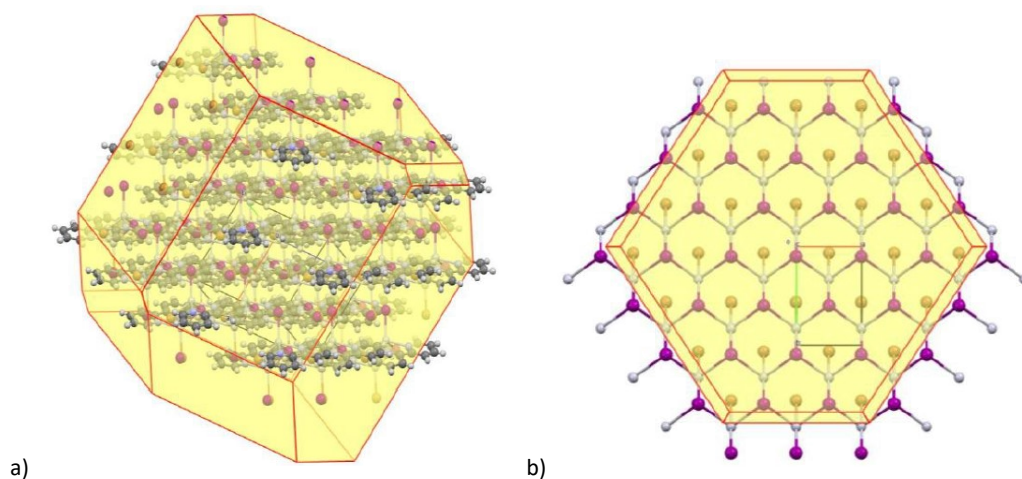

**Figure S14.** Crystal morphology of (a) indexed single crystal of [Hg(bpy)BrI] (**2**) along crystal face (010) and (b) HgBrI (**1**) along z axis. (Violet: iodine; grey: mercury; brown: bromide; grey: carbon; blue: nitrogen; white: hydrogen – ORTEP plot 50%).

**Table S2.** Calculated tensor components (a.u.) of the centrosymmetric (CS) and noncentrosymmetric (NCS) permutations of [Hg(bpy)Br] (**2**).

| Component | Permutation 1 (CS) |          | Permutation 2 (NCS) |          | Permutation 3 (NCS)       |          | Permutation 4 (CS)        |          |
|-----------|--------------------|----------|---------------------|----------|---------------------------|----------|---------------------------|----------|
|           | <b>B</b>           | $\chi^2$ | <b>B</b>            | $\chi^2$ | <b><math>\beta</math></b> | $\chi^2$ | <b><math>\beta</math></b> | $\chi^2$ |
| xxx       | -4.9618            | -0.0078  | -111.6000           | -0.1754  | 112.7800                  | 0.1772   | -0.1668                   | -0.0003  |
| xyy       | 0.4850             | 0.0008   | -13.9800            | -0.0220  | 12.3410                   | 0.0194   | -0.3270                   | -0.0005  |
| xxz       | 0.1661             | 0.0003   | 173.2700            | 0.2723   | -175.8500                 | -0.2763  | 0.0930                    | 0.0001   |
| xyy       | 0.7856             | 0.0012   | -220.2200           | -0.3460  | 219.6400                  | 0.3451   | 0.4467                    | 0.0007   |
| xyz       | -0.1053            | -0.0002  | -165.6000           | -0.2602  | 167.6000                  | 0.2634   | -0.0931                   | -0.0001  |
| xzz       | 0.2484             | 0.0004   | -97.9910            | -0.1540  | 98.1600                   | 0.1542   | 0.1866                    | 0.0003   |
| yyy       | 1.5703             | 0.0025   | 191.6500            | 0.3011   | -193.8400                 | -0.3046  | -0.5512                   | -0.0009  |
| yyz       | 0.0467             | 0.0001   | -64.4670            | -0.1013  | 67.6840                   | 0.1064   | 0.0890                    | 0.0001   |
| yzz       | 0.0745             | 0.0001   | -398.4500           | -0.6261  | 399.8500                  | 0.6283   | -0.4368                   | -0.0007  |
| zzz       | -0.3813            | -0.0006  | -23.5280            | -0.0370  | 27.6180                   | 0.0434   | 1.4800                    | 0.0023   |

**Table S3.** Calculated tensor components (a.u.) of HgBrI (**1**).

| Component | <b>B</b>   | $\chi^2$ |
|-----------|------------|----------|
| xxx       | 0.0000     | 0.0000   |
| xyy       | 0.0000     | 0.0000   |
| xxz       | -1196.7000 | -4.9925  |
| xyy       | 0.0000     | 0.0000   |
| xyz       | 0.0000     | 0.0000   |
| xzz       | 0.0000     | 0.0000   |
| yyy       | 0.0000     | 0.0000   |
| yyz       | 531.1100   | 2.2157   |
| yzz       | 0.0000     | 0.0000   |
| zzz       | 1592.4000  | 6.6434   |

## 2. DETAILS OF EXPERIMENTAL PROCEDURE

Single crystal data of compound **1-10** have been collected on a Gemini R Ultra diffractometer equipped with a nitrogen Oxford Diffraction CryojetHT device (Agilent Technologies UK Ltd., Oxford, U.K.) using graphite-monochromatic Mo(K $\alpha$ ) radiation ( $\lambda=0.71073$  Å) with the  $\omega$ -scan method. CrysAlisPro software (CrysAlis PRO 1.171.38.46 (Rigaku OD, 2015) has been used for retrieving cell parameters, for performing data reduction and for absorption correction (with multi-scan technique). All structures were solved by direct methods using ShelXS-14 [1] and refined with full-matrix least-squares on F<sup>2</sup> using the SHELXL-14 [2] in Olex<sup>2</sup> program [3]. All non-hydrogen atoms have been anisotropically refined. Hydrogen atoms have been calculated and riding on the corresponding atom. For measurement at low temperature of **1** and **2**, crystal was cooled through a nitrogen flux from room to 200 K in about 30 minutes and temperature was kept at 200 K during data collection. Structures images have been obtained using Mercury software [4]. Crystal data and refinement, selected bonds lengths and angles amplitudes and asymmetric units of compounds are reported in Crystallographic Tables. The crystallographic data for **1-10** have been deposited within the Cambridge Crystallographic Data Centre as supplementary publications under the CCDC numbers 2086278-2086292. This information can be obtained free of charge from the Cambridge Crystallographic Data Centre via [www.ccdc.cam.ac.uk/data\\_request/cifcodeCCDC](http://www.ccdc.cam.ac.uk/data_request/cifcodeCCDC).

Powder data have been collected using a X'Pert powder diffractometer operating in a Bragg–Brentano geometry, equipped with a graphite crystal monochromator and using Cu(K $\alpha$ 1) radiation ( $\lambda=1.5406$  Å). The elemental analyses (C, H, N and S) were carried out using a Thermo FlashEA 1112 CHNS-O analyser. Uv-Vis reflectance spectra were recorded on samples (diluted in Aerosil Ox 50) with a Cary 5000 UV-Vis spectrophotometer.

FT-Raman spectra were obtained with a Bruker Vertex 70 spectrometer, equipped with the RAMII accessory, by exciting with a 1064 nm laser, with a resolution of 4 cm<sup>-1</sup>. Attenuated Total Reflectance (ATR) and Far Infrared Spectroscopy (FIR) spectra were recorded in the 4000–0 cm<sup>-1</sup> range using a Bruker Vertex 70 spectrophotometer, equipped with a Harrick MVP2 ATR cell and DTGS detectors (either with Si or KBr beamsplitters). The adopted resolution was equal to 4 cm<sup>-1</sup> in all cases.

SHG emission was measured using two different methods: one using a NLO Multimodal microscope to get the SHG signal from a single crystal of [Hg(bpy)Br] (**2**) at different excitation angles, and the second using a specific excitation geometry over a sample of powder of HgBrI, [Hg(bpy)Br] (**2**), [Hg(phen)Br] (**4**) and [Hg(pyNP)Br] (**8**). In both measurements, the samples were excited using a pulsed source of about 5 ps pulse length and a wavelength of 1064 nm, generated by a master laser (picoTrain, HighQLaser). For such regards the SHG measurement of powder samples in the optical geometry adopted the excitation beam was deflected by a deformable mirror (Thorlabs DMH40-P01) and focused using a plano-convex lens with 25 mm of focal length on the powder sample. The powder was placed on a holder oriented at 45 degrees with respect to propagation direction of the excitation beam. The SHG signal was then acquired at 90 degrees with respect to the excitation beam propagation axis. The SHG signal was spectrally filtered and focused on a PMT using another plano-convex lens with 25 mm of focal length. For each sample the excitation beam was scanned with 360 angle points on an ideally circular closed line using the deformable mirror, and for each point the excitation power was changed cyclically 8 times. For each point the SHG intensity together with a portion of the excitation power were measured in two separate channels over 36500 times using a data acquisition card at a sample rate of 1 kS/s. For each position was then extracted the fitting parameter related to the following quadratic function that should represent the hyperpolarizability behaviour of the sample:

$$y = ax^2 + b$$

The parameters  $a$  and  $b$  were computed for all the positions, and the maximum value of  $a$  over the collected position was selected in order to take into account the maximum statistical potential of the related powder SHG emissions, since this is strongly related to the excitation angle with respect to the crystal's orientation in the powder.

In order to get SHG signal from a single crystal at different excitation angles, a single crystal of the compound was mounted in special sample holders and imaged using SHG microscopy technique. The excitation source was focused on the sample using a lens, and the emitted signal was collected by a PMT in the forward direction using a 4x lens, optically filtered allowing only a suitable transmission window peaked at 532 nm. Using an excitation lens with a numerical aperture of 0.75, the excitation wave vectors could have multiple angles easing the phase matching condition. In order to extract the emission ratios, the crystal was imaged in 3D several times at different excitation intensities. The single crystal was image-oriented in seven orthogonal angles with respect to the sample holder axis. The beam was transmitted through a polarizer beamsplitter, allowing only horizontal linear polarization exciting the sample. A very small part of the excitation signal was split with a broadband beamsplitter window and sent to a powermeter (PM30, Thorlabs with sensor S120B, Thorlabs). The analogue output of the powermeter was measured simultaneously with the second harmonic signal generated by the samples. Samples were 3D imaged in each orthogonal angle collecting about 15 Z slice images, setting the Z pitch between images in a way to acquire the whole sample. Using ImageJ software [5], a specific plug-in was developed to extract the average SHG signal from each slice of the 3D images. Before running the plug-in over the set of the collected 3D images, an overall max intensity Z projection was performed, and the region outside the compound shape was cleared and it was manually

[1] Sheldrick, G.M. A short history of SHELX. *Acta Crystallogr. Sect. A* **2008**, *64*, 112–122.

[2] Sheldrick, G.M. SHELXT - Integrated Space-Group And Crystal-Structure Determination. *Acta Crystallogr. Sect. A* **2015**, *71*, 3–8.

[3] Dolomanov, O.V.; Bourhis, L. J.; Gildea, R.J.; Howard, J.A.K.; Puschmann, H. OLEX2: A Complete Structure Solution, Refinement And Analysis Program. *J. Appl. Crystallogr.* **2009**, *42*, 339–341.

[4] (a) Macrae, C.F.; Bruno, I.J.; Chisholm, J.A.; Edgington, P.R.; McCabe, P.; Pidcock, E.; Rodriguez-Monge, L.; Taylor, R.; van de Streek, J.; Wood, P.A.; *J. Appl. Cryst.* **2008**, *41*, 466–470; (b) Macrae, C.F.; Edgington, P.R.; McCabe, P.; Pidcock, E.; Shields, G.P.; Taylor, R.; Towler, M.; van de Streek, J. *J. Appl. Cryst.* **2006**, *39*, 453–457; (c) Bruno, I.J.; Cole, J.C.; Edgington, P.R.; Kessler, M.K.; Macrae, C.F.; McCabe, P.; Pearson, J.; Taylor, R. *Acta Cryst.* **2002**, *B58*, 389–397; (d) Taylor, R.; Macrae, C.F.; *Acta Cryst.* **2001**, *B57*, 815–827.

[5] Rasband, W.S. Image J (1997–2014) US National Institutes of Health, Bethesda, Maryland, USA. <http://imagej.nih.gov/ij/>

chosen a threshold value to discriminate the foreground object from the background. The plug-in was then launched using as input parameters the chosen threshold value and the size in pixel units of the smaller objects recognizable as foreground to filter false objects due to noise out from computation of the intensity average. At the end of the plug-in, a result table was computed containing all the average intensities per slice images and the overall 3D image average intensities. Since the second harmonic signals measured in function of the excitation power must have a quadratic dependence, the plugin also processes the average intensities per excitation power and extracts the fitting parameter related to the following quadratic function that should represent the hyperpolarizability behaviour of the sample:

$$y = ax^2 + b$$

The parameters  $a$  and  $b$  were computed for all the orientation angles, and an average value of  $a$  was extracted in order to take into account an average behaviour of the crystal's emissions.

Periodic simulations on the experimental cells were carried out with the CRYSTAL17 code. All the calculations were performed with the B3LYP-D\*0, which is the B3LYP functional [6] plus the a posteriori correction term (D\*0) to account for dispersive interactions (partly missed in pure DFT). The D\*0 is a modification of the D\* scheme [7], which, in turn, recalls the original Grimme D2 correction [8] optimized for solid systems (the van der Waals atomic radii (R0) coefficients are scaled by 1.3 for hydrogen and 1.05 for all the other atoms). The further modification of the D\*0 means that C6 coefficients on positively charged metals are set to 0 (i.e. no dispersion on Hg atoms). This approach was already tested, providing good results, especially on alkali and alkaline-earth metals [9], but it is successfully translated also to transition metals. The basis set chosen is the Ahlrichs TZVP, modified for solid systems [10] on all the atoms but mercury, for which a HayWadt-64-4(31d) was used [11]. The tolerance on energy for the convergence of the self-consistent field (SCF) iterative procedure was set to the default (i.e.  $10^{-7}$  Hartree on geometry optimization and  $10^{-11}$  Hartree on frequency calculations). Tolerances in the integral calculation were set to  $10^{-9}$  Hartree for Coulomb overlap, Coulomb penetration, exchange overlap and exchange pseudo-overlap in the direct space and to  $10^{-30}$  Hartree for the exchange pseudo-overlap in the reciprocal space. The Pack-Monkhorst/Gilat shrinking factors for the reciprocal space on pure HgBrI phase were set to 8, while for the larger cell of [Hg(bpy)BrI] (**2**) they were set to 2. The tolerance on gradients and displacements were tightened to 0.0001 au and 0.0004 bohr, respectively. Vibrational frequencies were computed at the  $\Gamma$  point by numerical differentiation of analytical first derivatives (3 displacements for each atom of the unit cell, one for each cartesian direction). [12] In few cases, where small (less than  $10 \text{ cm}^{-1}$ ) imaginary frequencies appear, we relied on the central difference formula, i.e. 6 displacements for each atom of the unit cell, two for each cartesian direction (so reducing spurious numerical errors). IR and Raman intensities were evaluated through the Couple-Perturbed Hartree-Fock (CPHF) method [13] to simulate IR and Raman spectra of the compounds studied. Raman intensities were corrected for the experimental parameters at which spectra were recorded, by including the working temperature and laser wavelength in the calculation.

Because of the uncertainty of the Br and I positions in the structure of **1**, all the possible permutations on the crystallographic cell of Br and I were optimized. In the specific, as the crystallographic cell consists of 4 HgBrI formula units, the number of possible

$$\frac{8!}{4! * 4!} = 70$$

permutations are:  $4! * 4! = 70$ . Among the isomers generated, 24 out of 70 present one or more imaginary frequencies (even when removing symmetry constraints and using the central difference formula) and, accordingly, they were not used for further analysis. Moreover, some of the remaining structures collapsed on the same local minimum during the optimization procedure. After the cleaning process of all the unstable and repetitive isomers, 25 structures were used to build up the final spectrum. Therefore, all the Raman spectra were merged together, rescaling the intensities by the proper Boltzmann factor, calculated from the corresponding enthalpies of each configuration (with respect to the most stable isomer). Similarly, also for structure of [Hg(bpy)BrI] (**2**) the effect of the substitutional disorder was taken into account, obtaining 4 possible permutations of the Br and I positions.

[6] (a) Becke, A.D. Density-Functional Exchange-Energy Approximation with Correct Asymptotic Behavior. *Phys. Rev. A* **1988**, *38*(6), 3098-3100; (b) Lee, C.; Yang, W.; Parr, R.G. Development of the Colle-Salvetti Correlation-Energy Formula into a Functional of the Electron Density. *Phys. Rev. B* **1988**, *37*(2), 785-789.

[7] Civalleri, B.; Zicovich-Wilson, C. M.; Valenzano, L.; Ugliengo, P. B3LYP Augmented with an Empirical Dispersion Term (B3LYP-D\*) as Applied to Molecular Crystals. *Cryst. Eng. Comm.* **2008**, *10*(4), 368-376.

[8] (a) Grimme, S. Accurate Description of van Der Waals Complexes by Density Functional Theory Including Empirical Corrections. *J. Comput. Chem.* **2004**, *25*(12), 1463-1473; (b) Grimme, S. Semiempirical GGA-Type Density Functional Constructed with a Long-Range Dispersion Correction. *J. Comput. Chem.* **2006**, *27*(15), 1787-1799.

[9] Cutini, M.; Maschio, L.; Ugliengo, P. Exfoliation Energy of Layered Materials by DFT-D: Beware of Dispersion! *J. Chem. Theory Comput.* **2020**, *16*(8), 5244-5252.

[10] (a) Peintinger, M. F.; Oliveira, D. V.; Bredow, T. Consistent Gaussian Basis Sets of Triple-Zeta Valence with Polarization Quality for Solid-State Calculations. *J. Comput. Chem.* **2013**, *34*(6), 451-459; (b) Laun, J.; Vilela Oliveira, D.; Bredow, T. Consistent Gaussian Basis Sets of Double- and Triple-Zeta Valence with Polarization Quality of the Fifth Period for Solid-State Calculations. *J. Comput. Chem.* **2018**, *39*(19), 1285-1290; (c) Vilela Oliveira, D.; Laun, J.; Peintinger, M. F.; Bredow, T. BSSE-Correction Scheme for Consistent Gaussian Basis Sets of Double- and Triple-Zeta Valence with Polarization Quality for Solid-State Calculations. *J. Comput. Chem.* **2019**, *40*(27), 2364-2376.

[11] Wehrich, R.; Anusca, I.; Zebel, M. Halbantiperovskites: On the Crystal Structure of the Shandites ( $\text{Ni}_3\text{In}_2\text{S}_2$ ) and Their Structure Relations to  $\text{Hg}_3\text{S}_2\text{Cl}_2$  and  $\text{K}_2\text{Sn}_2\text{O}_3$ . *Anorg. Allg. Chem.* **2005**, *631*, 1463-1470.

[12] (a) Pascale, F.; Zicovich-Wilson, C.M.; Gejo, F. L.; Civalleri, B.; Orlando, R.; Dovesi, R. The Calculation of the Vibrational Frequencies of Crystalline Compounds and Its Implementation in the CRYSTAL Code. *J. Comput. Chem.* **2004**, *25*, 888-897; (b) Zicovich-Wilson, C. M.; Pascale, F.; Roetti, C.; Saunders, V.R.; Orlando, R.; Dovesi, R. Calculation of the Vibration Frequencies of  $\alpha$ -Quartz: The Effect of Hamiltonian and Basis Set. *J. Comput. Chem.* **2004**, *25*, 1873-1881.

[13] (a) Ferrero, M.; Rérat, M.; Orlando, R.; Dovesi, R. The Calculation of Static Polarizabilities of 1-3D Periodic Compounds. The Implementation in the CRYSTAL Code. *J. Comput. Chem.* **2008**, *29*, 1450-1459; (b) Kirtman, B.; Lacivita, V.; Dovesi, R.; Reis, H. Electric Field Polarization in Conventional Density Functional Theory: From Quasilinear to Two-Dimensional and Three-Dimensional Extended Systems. *J. Chem. Phys.* **2011**, *135*, 154101.

### 3. CRYSTALLOGRAPHIC TABLES

**Table S4.** Crystal data and structure refinement for HgBrI (1) at 299 K (a) and at 200 K (b).

|                                                              | (a)                                                                         | (b)                                                                         |
|--------------------------------------------------------------|-----------------------------------------------------------------------------|-----------------------------------------------------------------------------|
| Empirical formula                                            | BrHgI                                                                       | BrHgI                                                                       |
| Formula weight                                               | 407.40                                                                      | 407.40                                                                      |
| Temperature/K                                                | 299.0                                                                       | 200.00(10)                                                                  |
| Crystal system                                               | Orthorhombic                                                                | Orthorhombic                                                                |
| Space group                                                  | <i>Cmc</i> 2 <sub>1</sub>                                                   | <i>Cmc</i> 2 <sub>1</sub>                                                   |
| <i>a</i> /Å                                                  | 4.6816(11)                                                                  | 4.6018(10)                                                                  |
| <i>b</i> /Å                                                  | 7.1488(15)                                                                  | 6.8966(12)                                                                  |
| <i>c</i> /Å                                                  | 13.371(3)                                                                   | 12.648(3)                                                                   |
| $\alpha$ /°                                                  | 90                                                                          | 90                                                                          |
| $\beta$ /°                                                   | 90                                                                          | 90                                                                          |
| $\gamma$ /°                                                  | 90                                                                          | 90                                                                          |
| Volume/Å <sup>3</sup>                                        | 447.48(17)                                                                  | 401.40(15)                                                                  |
| <i>Z</i>                                                     | 4                                                                           | 4                                                                           |
| $\rho_{\text{calc}}$ /g·cm <sup>-3</sup>                     | 6.047                                                                       | 6.741                                                                       |
| $\mu$ /mm <sup>-1</sup>                                      | 49.995                                                                      | 55.735                                                                      |
| <i>F</i> (000)                                               | 672.0                                                                       | 672.0                                                                       |
| Crystal size/mm <sup>3</sup>                                 | 0.35 × 0.33 × 0.22                                                          | 0.25 × 0.22 × 0.15                                                          |
| Radiation                                                    | MoK $\alpha$ ( $\lambda$ = 0.71073)                                         | MoK $\alpha$ ( $\lambda$ = 0.71073)                                         |
| 2 $\theta$ range for data collection/°                       | 9.146 to 58.454                                                             | 9.67 to 52.73                                                               |
| Index ranges                                                 | -6 ≤ <i>h</i> ≤ 4, -7 ≤ <i>k</i> ≤ 9, -13 ≤ <i>l</i> ≤ 17                   | -5 ≤ <i>h</i> ≤ 5, -6 ≤ <i>k</i> ≤ 8, -15 ≤ <i>l</i> ≤ 15                   |
| Reflections collected                                        | 876                                                                         | 1784                                                                        |
| Independent reflections                                      | 467 [ <i>R</i> <sub>int</sub> = 0.0347, <i>R</i> <sub>sigma</sub> = 0.0434] | 457 [ <i>R</i> <sub>int</sub> = 0.0883, <i>R</i> <sub>sigma</sub> = 0.0666] |
| Data/restraints/parameters                                   | 467/1/20                                                                    | 457/37/20                                                                   |
| Goodness-of-fit on <i>F</i> <sup>2</sup>                     | 1.097                                                                       | 1.109                                                                       |
| Final <i>R</i> indexes [ <i>I</i> > 2 $\sigma$ ( <i>I</i> )] | <i>R</i> <sub>1</sub> = 0.0432,<br><i>wR</i> <sub>2</sub> = 0.1003          | <i>R</i> <sub>1</sub> = 0.0649,<br><i>wR</i> <sub>2</sub> = 0.1690          |
| Final <i>R</i> indexes [all data]                            | <i>R</i> <sub>1</sub> = 0.0523,<br><i>wR</i> <sub>2</sub> = 0.1116          | <i>R</i> <sub>1</sub> = 0.0725,<br><i>wR</i> <sub>2</sub> = 0.1754          |
| Largest diff. peak/hole / e Å <sup>-3</sup>                  | 1.28/-1.96                                                                  | 3.94/-2.89                                                                  |
| Flack parameter                                              | 0.01(2)                                                                     | 0.06(4)                                                                     |

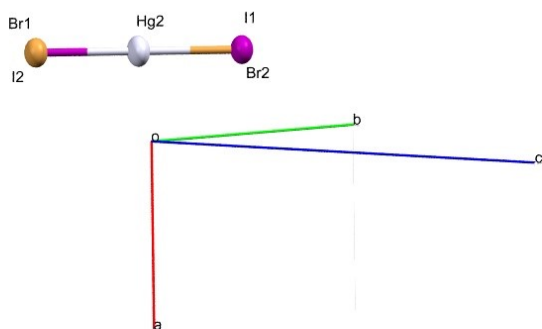

**Figure S15.** ORTEP plot of the asymmetric unit for HgBrI (1) (*a* axis = red, *b* axis = green, *c* axis = blue).

**Table S5.** Bond Lengths for HgBrI (1) at 299 K (a) and at 200 K (b).

|    | Atom                                                                                                                     | Atom             | Length/Å | Atom | Atom | Length/Å |
|----|--------------------------------------------------------------------------------------------------------------------------|------------------|----------|------|------|----------|
| a) | Hg1                                                                                                                      | Br2              | 2.569(3) | Hg1  | Br1  | 2.542(4) |
|    | Hg1                                                                                                                      | I2               | 2.542(4) | Hg1  | I1   | 2.569(3) |
|    | Hg1                                                                                                                      | I1A <sup>1</sup> | 3.263(5) | Hg1  | Br1A | 2.478(6) |
| b) | Hg1                                                                                                                      | I1A <sup>2</sup> | 3.263(5) | Hg1  | Br2A | 2.477(6) |
|    | Hg1                                                                                                                      | I1A              | 2.477(6) | Hg1  | I2A  | 2.478(6) |
|    | <sup>1</sup> = 1/2+ <i>X</i> , -1/2+ <i>Y</i> , + <i>Z</i> ; <sup>2</sup> = -1/2+ <i>X</i> , -1/2+ <i>Y</i> , + <i>Z</i> |                  |          |      |      |          |

**Table S6.** Bond Angles for HgBrI (1) at 299 K (a) and at 200 K (b).

|    | Atom             | Atom | Atom             | Angle/°    | Atom             | Atom | Atom             | Angle/°    |
|----|------------------|------|------------------|------------|------------------|------|------------------|------------|
| a) | I2               | Hg1  | Br2              | 179.27(17) | Br1              | Hg1  | I1               | 179.27(17) |
| b) | I1A <sup>1</sup> | Hg1  | I1A <sup>2</sup> | 89.70(17)  | Br2A             | Hg1  | I1A              | 0.0        |
|    | I1A              | Hg1  | I1A <sup>1</sup> | 91.44(16)  | Br2A             | Hg1  | Br1A             | 179.8(3)   |
|    | I1A              | Hg1  | I1A <sup>2</sup> | 91.44(16)  | Br2A             | Hg1  | I2A              | 179.8(3)   |
|    | I1A              | Hg1  | Br1A             | 179.8(3)   | I2A              | Hg1  | I1A <sup>2</sup> | 88.39(14)  |
|    | I1A              | Hg1  | I2A              | 179.8(3)   | I2A              | Hg1  | I1A <sup>1</sup> | 88.39(14)  |
|    | Br1A             | Hg1  | I1A <sup>2</sup> | 88.39(14)  | I2A              | Hg1  | Br1A             | 0.0        |
|    | Br1A             | Hg1  | I1A <sup>1</sup> | 88.39(14)  | Hg1 <sup>3</sup> | I1A  | Hg1 <sup>4</sup> | 89.69(17)  |
|    | Br2A             | Hg1  | I1A <sup>1</sup> | 91.44(16)  | Hg1              | I1A  | Hg1 <sup>3</sup> | 91.44(16)  |
|    | Br2A             | Hg1  | I1A <sup>2</sup> | 91.44(16)  | Hg1              | I1A  | Hg1 <sup>4</sup> | 91.44(16)  |

<sup>1</sup> = -1/2+X, -1/2+Y, +Z; <sup>2</sup> = 1/2+X, -1/2+Y, +Z; <sup>3</sup> = 1/2+X, 1/2+Y, +Z; <sup>4</sup> = -1/2+X, 1/2+Y, +Z

**Table S7.** Atomic Occupancy for HgBrI (1) at 299 K.

| Atom | Occupancy | Atom | Occupancy |
|------|-----------|------|-----------|
| Br1  | 0.5       | Br2  | 0.5       |
| I1   | 0.5       | I2   | 0.5       |

**Table S8.** Comparison of the results of centrosymmetric and noncentrosymmetric refinements for [Hg(bpy)BrI] (2) obtained from measurements at 299 K (a) and 200 K (b) on the same crystal.

|                                                   |                                                               |                                                               |                                                    |
|---------------------------------------------------|---------------------------------------------------------------|---------------------------------------------------------------|----------------------------------------------------|
| (a)                                               | <b>Empirical formula</b>                                      | C <sub>10</sub> H <sub>8</sub> BrHgIN <sub>2</sub>            | C <sub>10</sub> H <sub>8</sub> BrHgIN <sub>2</sub> |
|                                                   | <b>Formula weight</b>                                         | 563.58                                                        | 563.58                                             |
|                                                   | <b>Temperature/K</b>                                          | 299                                                           | 299                                                |
|                                                   | <b>Crystal system</b>                                         | Triclinic                                                     | Triclinic                                          |
|                                                   | <b>Space group</b>                                            | <i>P</i> -1                                                   | <i>P</i> 1                                         |
|                                                   | <b>a/Å</b>                                                    | 8.6933(5)                                                     | 8.6933(5)                                          |
|                                                   | <b>b/Å</b>                                                    | 9.1875(7)                                                     | 9.1875(7)                                          |
|                                                   | <b>c/Å</b>                                                    | 9.4039(8)                                                     | 9.4039(8)                                          |
|                                                   | <b>α/°</b>                                                    | 118.877(8)                                                    | 118.877(8)                                         |
|                                                   | <b>β/°</b>                                                    | 102.032(6)                                                    | 102.032(6)                                         |
|                                                   | <b>γ/°</b>                                                    | 96.897(5)                                                     | 96.897(5)                                          |
|                                                   | <b>Volume/Å<sup>3</sup></b>                                   | 621.51(9)                                                     | 621.51(9)                                          |
|                                                   | <b>Z</b>                                                      | 2                                                             | 2                                                  |
|                                                   | <b>ρ<sub>calc</sub>/g cm<sup>3</sup></b>                      | 3.012                                                         | 3.012                                              |
|                                                   | <b>μ/mm<sup>-1</sup></b>                                      | 18.049                                                        | 18.049                                             |
|                                                   | <b>F(000)</b>                                                 | 500.0                                                         | 500.0                                              |
|                                                   | <b>Crystal size/mm<sup>3</sup></b>                            | 0.15 × 0.11 × 0.09                                            | 0.15 × 0.11 × 0.09                                 |
| <b>Radiation</b>                                  | MoKα (λ = 0.71073)                                            | MoKα (λ = 0.71073)                                            |                                                    |
| <b>2θ range for data collection/°</b>             | 6.942 to 61.014                                               | 6.942 to 61.014                                               |                                                    |
| <b>Index ranges</b>                               | -12 ≤ h ≤ 12, -13 ≤ k ≤ 13, -13 ≤ l ≤ 13                      | -12 ≤ h ≤ 12, -13 ≤ k ≤ 13, -13 ≤ l ≤ 13                      |                                                    |
| <b>Reflections collected</b>                      | 17090                                                         | 17090                                                         |                                                    |
| <b>Independent reflections</b>                    | 3784 [R <sub>int</sub> = 0.0787, R <sub>sigma</sub> = 0.0664] | 7555 [R <sub>int</sub> = 0.0665, R <sub>sigma</sub> = 0.0990] |                                                    |
| <b>Data/restraints/parameters</b>                 | 3784/0/155                                                    | 7555/195/290                                                  |                                                    |
| <b>Goodness-of-fit on F<sup>2</sup></b>           | 1.011                                                         | 0.987                                                         |                                                    |
| <b>Final R indexes [I &gt;= 2σ (I)]</b>           | R <sub>1</sub> = 0.0436, wR <sub>2</sub> = 0.0731             | R <sub>1</sub> = 0.0521, wR <sub>2</sub> = 0.0748             |                                                    |
| <b>Final R indexes [all data]</b>                 | R <sub>1</sub> = 0.0944, wR <sub>2</sub> = 0.0889             | R <sub>1</sub> = 0.1215, wR <sub>2</sub> = 0.0978             |                                                    |
| <b>Largest diff. peak/hole / e Å<sup>-3</sup></b> | 1.07/-1.18                                                    | 1.04/-1.15                                                    |                                                    |
| (b)                                               | <b>Empirical formula</b>                                      | C <sub>10</sub> H <sub>8</sub> BrHgIN <sub>2</sub>            | C <sub>10</sub> H <sub>8</sub> BrHgIN <sub>2</sub> |
|                                                   | <b>Formula weight</b>                                         | 563.58                                                        | 563.58                                             |
|                                                   | <b>Temperature/K</b>                                          | 200.00(10)                                                    | 200.00(10)                                         |
|                                                   | <b>Crystal system</b>                                         | Triclinic                                                     | Triclinic                                          |
|                                                   | <b>Space group</b>                                            | <i>P</i> -1                                                   | <i>P</i> 1                                         |
|                                                   | <b>a/Å</b>                                                    | 8.6535(7)                                                     | 8.6535(7)                                          |
|                                                   | <b>b/Å</b>                                                    | 9.1595(11)                                                    | 9.1595(11)                                         |
|                                                   | <b>c/Å</b>                                                    | 9.3691(11)                                                    | 9.3691(11)                                         |
|                                                   | <b>α/°</b>                                                    | 119.058(12)                                                   | 119.058(12)                                        |
|                                                   | <b>β/°</b>                                                    | 102.403(8)                                                    | 102.403(8)                                         |
|                                                   | <b>γ/°</b>                                                    | 96.859(8)                                                     | 96.859(8)                                          |
|                                                   | <b>Volume/Å<sup>3</sup></b>                                   | 611.83(13)                                                    | 611.83(13)                                         |

|                                                |                                                                  |                                                                  |
|------------------------------------------------|------------------------------------------------------------------|------------------------------------------------------------------|
| Z                                              | 2                                                                | 2                                                                |
| $\rho_{\text{calc}}/\text{g cm}^3$             | 3.059                                                            | 3.059                                                            |
| $\mu/\text{mm}^{-1}$                           | 18.335                                                           | 18.335                                                           |
| F(000)                                         | 500.0                                                            | 500.0                                                            |
| Crystal size/ $\text{mm}^3$                    | 0.15 × 0.12 × 0.09                                               | 0.15 × 0.12 × 0.09                                               |
| Radiation                                      | MoK $\alpha$ ( $\lambda = 0.71073$ )                             | MoK $\alpha$ ( $\lambda = 0.71073$ )                             |
| 2 $\theta$ range for data collection/ $^\circ$ | 6.96 to 61.012                                                   | 6.96 to 61.012                                                   |
| Index ranges                                   | -10 ≤ h ≤ 12, -13 ≤ k ≤ 13, -13 ≤ l ≤ 13                         | -10 ≤ h ≤ 12, -13 ≤ k ≤ 13, -13 ≤ l ≤ 13                         |
| Reflections collected                          | 10789                                                            | 10789                                                            |
| Independent reflections                        | 3725 [ $R_{\text{int}} = 0.0744$ , $R_{\text{sigma}} = 0.0876$ ] | 5843 [ $R_{\text{int}} = 0.0637$ , $R_{\text{sigma}} = 0.1012$ ] |
| Data/restraints/parameters                     | 3725/206/154                                                     | 5843/201/299                                                     |
| Goodness-of-fit on $F^2$                       | 1.034                                                            | 1.024                                                            |
| Final R indexes [ $I \geq 2\sigma(I)$ ]        | $R_1 = 0.0498$ , $wR_2 = 0.0870$                                 | $R_1 = 0.0550$ , $wR_2 = 0.1210$                                 |
| Final R indexes [all data]                     | $R_1 = 0.0827$ , $wR_2 = 0.1023$                                 | $R_1 = 0.0927$ , $wR_2 = 0.1465$                                 |
| Largest diff. peak/hole / $e \text{ \AA}^{-3}$ | 1.44/-1.86                                                       | 1.48/-2.21                                                       |

Table S9. Crystal data and structure refinement for [Hg(bpy)Br] (2) in the noncentrosymmetric refinement.

|                                                  |                                                                  |
|--------------------------------------------------|------------------------------------------------------------------|
| Empirical formula                                | $\text{C}_{10}\text{H}_8\text{BrHgIn}_2$                         |
| Formula weight                                   | 563.58                                                           |
| Temperature/K                                    | 298.00                                                           |
| Crystal system                                   | Triclinic                                                        |
| Space group                                      | $P1$                                                             |
| a/ $\text{\AA}$                                  | 8.6880(4)                                                        |
| b/ $\text{\AA}$                                  | 9.1908(5)                                                        |
| c/ $\text{\AA}$                                  | 9.3998(6)                                                        |
| $\alpha/^\circ$                                  | 118.781(6)                                                       |
| $\beta/^\circ$                                   | 102.005(5)                                                       |
| $\gamma/^\circ$                                  | 96.962(4)                                                        |
| Volume/ $\text{\AA}^3$                           | 621.64(7)                                                        |
| Z                                                | 2                                                                |
| $\rho_{\text{calc}}/\text{g}\cdot\text{cm}^{-3}$ | 3.011                                                            |
| $\mu/\text{mm}^{-1}$                             | 18.045                                                           |
| F(000)                                           | 500.0                                                            |
| Crystal size/ $\text{mm}^3$                      | 0.12 × 0.1 × 0.08                                                |
| Radiation                                        | MoK $\alpha$ ( $\lambda = 0.71073$ )                             |
| 2 $\theta$ range for data collection/ $^\circ$   | 6.948 to 52.726                                                  |
| Index ranges                                     | -10 ≤ h ≤ 10, -11 ≤ k ≤ 11, -11 ≤ l ≤ 11                         |
| Reflections collected                            | 9237                                                             |
| Independent reflections                          | 5026 [ $R_{\text{int}} = 0.0379$ , $R_{\text{sigma}} = 0.0634$ ] |
| Data/restraints/parameters                       | 5026/147/271                                                     |
| Goodness-of-fit on $F^2$                         | 1.051                                                            |
| Final R indexes [ $I \geq 2\sigma(I)$ ]          | $R_1 = 0.0551$ , $wR_2 = 0.1374$                                 |
| Final R indexes [all data]                       | $R_1 = 0.0826$ , $wR_2 = 0.1596$                                 |
| Largest diff. peak/hole / $e \text{ \AA}^{-3}$   | 1.80/-2.13                                                       |
| Flack parameter                                  | 0.44(3)                                                          |

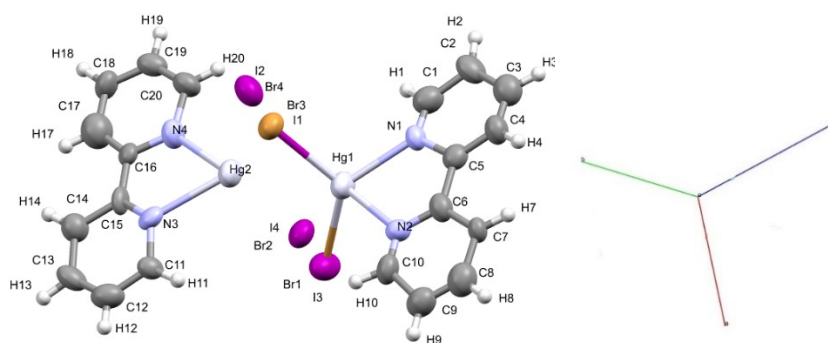

Figure S16. ORTEP plot of the asymmetric unit for [Hg(bpy)Br] (2) (a axis = red, b axis = green, c axis = blue).

**Table S10.** Bond Lengths for [Hg(bpy)Br] (2).

| Atom | Atom | Length/Å | Atom | Atom | Length/Å |
|------|------|----------|------|------|----------|
| Hg1  | I1   | 2.622(4) | C17  | C18  | 1.40(7)  |
| Hg1  | Br1  | 2.575(4) | C16  | C15  | 1.40(5)  |
| Hg1  | N1   | 2.32(3)  | C5   | C4   | 1.35(6)  |
| Hg1  | N2   | 2.45(3)  | C5   | N1   | 1.44(5)  |
| Hg1  | I3   | 2.575(4) | C5   | C6   | 1.56(6)  |
| Hg1  | Br3  | 2.622(4) | C15  | C14  | 1.42(6)  |
| Hg2  | Br4  | 2.614(4) | C1   | C2   | 1.42(7)  |
| Hg2  | Br2  | 2.623(4) | C1   | N1   | 1.22(6)  |
| Hg2  | N3   | 2.43(4)  | C11  | C12  | 1.37(7)  |
| Hg2  | N4   | 2.36(4)  | C2   | C3   | 1.46(6)  |
| Hg2  | I4   | 2.623(4) | C13  | C14  | 1.48(6)  |
| Hg2  | I2   | 2.614(4) | C13  | C12  | 1.34(6)  |
| N3   | C15  | 1.26(5)  | C4   | C3   | 1.23(6)  |
| N3   | C11  | 1.44(5)  | N2   | C10  | 1.16(5)  |
| N4   | C20  | 1.50(5)  | N2   | C6   | 1.32(5)  |
| N4   | C16  | 1.34(5)  | C10  | C9   | 1.54(6)  |
| C19  | C20  | 1.33(6)  | C7   | C6   | 1.40(6)  |
| C19  | C18  | 1.36(6)  | C7   | C8   | 1.46(7)  |
| C17  | C16  | 1.32(7)  | C9   | C8   | 1.26(7)  |

**Table S11.** Bond Angles for [Hg(bpy)Br] (2).

| Atom | Atom | Atom | Angle/°    | Atom | Atom | Atom | Angle/° |
|------|------|------|------------|------|------|------|---------|
| Br1  | Hg1  | I1   | 122.39(14) | C16  | N4   | C20  | 118(3)  |
| Br1  | Hg1  | Br3  | 122.39(14) | C20  | C19  | C18  | 125(4)  |
| N1   | Hg1  | I1   | 103.8(8)   | C16  | C17  | C18  | 125(5)  |
| N1   | Hg1  | Br1  | 132.4(8)   | C19  | C20  | N4   | 117(4)  |
| N1   | Hg1  | N2   | 71.9(11)   | N4   | C16  | C15  | 113(3)  |
| N1   | Hg1  | I3   | 132.4(8)   | C17  | C16  | N4   | 120(4)  |
| N1   | Hg1  | Br3  | 103.8(8)   | C17  | C16  | C15  | 127(4)  |
| N2   | Hg1  | I1   | 121.4(8)   | C4   | C5   | N1   | 122(4)  |
| N2   | Hg1  | Br1  | 91.4(8)    | C4   | C5   | C6   | 125(4)  |
| N2   | Hg1  | I3   | 91.4(8)    | N1   | C5   | C6   | 113(3)  |
| N2   | Hg1  | Br3  | 121.4(8)   | N3   | C15  | C16  | 122(3)  |
| I3   | Hg1  | I1   | 122.39(14) | N3   | C15  | C14  | 117(4)  |
| I3   | Hg1  | Br1  | 0.0        | C16  | C15  | C14  | 120(4)  |
| I3   | Hg1  | Br3  | 122.39(14) | C19  | C18  | C17  | 115(4)  |
| Br3  | Hg1  | I1   | 0.0        | N1   | C1   | C2   | 128(5)  |
| Br4  | Hg2  | Br2  | 122.96(13) | C12  | C11  | N3   | 117(4)  |
| Br4  | Hg2  | I4   | 122.96(13) | C1   | C2   | C3   | 114(4)  |
| Br2  | Hg2  | I4   | 0.0        | C12  | C13  | C14  | 122(4)  |
| N3   | Hg2  | Br4  | 129.2(7)   | C3   | C4   | C5   | 124(5)  |
| N3   | Hg2  | Br2  | 106.8(7)   | C4   | C3   | C2   | 117(5)  |
| N3   | Hg2  | I4   | 106.8(7)   | C15  | C14  | C13  | 117(4)  |
| N3   | Hg2  | I2   | 129.2(7)   | C5   | N1   | Hg1  | 119(2)  |
| N4   | Hg2  | Br4  | 93.8(9)    | C1   | N1   | Hg1  | 128(3)  |
| N4   | Hg2  | Br2  | 121.8(9)   | C1   | N1   | C5   | 112(4)  |
| N4   | Hg2  | N3   | 65.7(11)   | C10  | N2   | Hg1  | 122(3)  |
| N4   | Hg2  | I4   | 121.8(9)   | C10  | N2   | C6   | 122(4)  |
| N4   | Hg2  | I2   | 93.8(9)    | C6   | N2   | Hg1  | 115(3)  |
| I2   | Hg2  | Br4  | 0.0        | N2   | C10  | C9   | 126(4)  |
| I2   | Hg2  | Br2  | 122.96(13) | C6   | C7   | C8   | 113(4)  |
| I2   | Hg2  | I4   | 122.96(13) | N2   | C6   | C5   | 120(4)  |
| C15  | N3   | Hg2  | 117(3)     | N2   | C6   | C7   | 122(4)  |
| C15  | N3   | C11  | 126(4)     | C7   | C6   | C5   | 118(4)  |
| C11  | N3   | Hg2  | 114(2)     | C8   | C9   | C10  | 111(5)  |
| C20  | N4   | Hg2  | 120(3)     | C9   | C8   | C7   | 127(5)  |
| C16  | N4   | Hg2  | 122(3)     | C13  | C12  | C11  | 119(4)  |



**Table S12.** Atomic Occupancy for [Hg(bpy)Br] (2).

| Atom | Occupancy | Atom | Occupancy |
|------|-----------|------|-----------|
| I2   | 0.472(11) | Br4  | 0.528(11) |
| I4   | 0.517(9)  | Br2  | 0.483(9)  |

**Table S13.** Crystal data and structure refinement for [Hg(dmbpy)Br] (3).

|                                                              |                                                               |
|--------------------------------------------------------------|---------------------------------------------------------------|
| Identification code                                          | HgBrI(dmbipy)                                                 |
| Empirical formula                                            | C <sub>12</sub> H <sub>12</sub> BrHgIN <sub>2</sub>           |
| Formula weight                                               | 591.64                                                        |
| Temperature/K                                                | 297.00                                                        |
| Crystal system                                               | orthorhombic                                                  |
| Space group                                                  | <i>Pbca</i>                                                   |
| <i>a</i> /Å                                                  | 14.9218(16)                                                   |
| <i>b</i> /Å                                                  | 13.996(2)                                                     |
| <i>c</i> /Å                                                  | 15.1066(17)                                                   |
| $\alpha$ /°                                                  | 90                                                            |
| $\beta$ /°                                                   | 90                                                            |
| $\gamma$ /°                                                  | 90                                                            |
| Volume/Å <sup>3</sup>                                        | 3155.0(7)                                                     |
| <i>Z</i>                                                     | 8                                                             |
| $\rho_{\text{calc}}/\text{g cm}^{-3}$                        | 2.491                                                         |
| $\mu/\text{mm}^{-1}$                                         | 14.229                                                        |
| <i>F</i> (000)                                               | 2128.0                                                        |
| Crystal size/mm <sup>3</sup>                                 | 0.13 × 0.1 × 0.08                                             |
| Radiation                                                    | MoK $\alpha$ ( $\lambda$ = 0.71073)                           |
| 2 $\theta$ range for data collection/°                       | 6.71 to 52.744                                                |
| Index ranges                                                 | -18 ≤ <i>h</i> ≤ 18, -17 ≤ <i>k</i> ≤ 17, -18 ≤ <i>l</i> ≤ 15 |
| Reflections collected                                        | 25849                                                         |
| Independent reflections                                      | 3224 [Rint = 0.0885, Rsigma = 0.0529]                         |
| Data/restraints/parameters                                   | 3224/0/156                                                    |
| Goodness-of-fit on <i>F</i> <sup>2</sup>                     | 1.038                                                         |
| Final <i>R</i> indexes [ <i>I</i> ≥ 2 $\sigma$ ( <i>I</i> )] | R1 = 0.0565, wR2 = 0.1501                                     |
| Final <i>R</i> indexes [all data]                            | R1 = 0.1065, wR2 = 0.1822                                     |
| Largest diff. peak/hole / e Å <sup>-3</sup>                  | 1.90/-1.71                                                    |

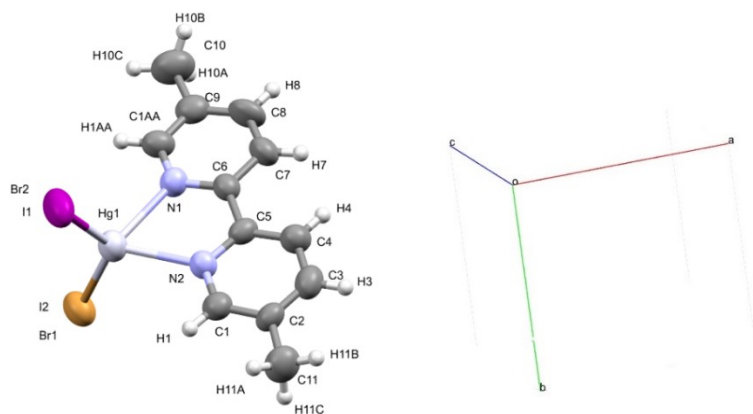**Figure S17.** ORTEP plot of the asymmetric unit for [HgBrI(dmbipy)] (3) (*a* axis =red, *b* axis=green, *c* axis= blue).**Table S14.** Bond Lengths for [Hg(dmbpy)Br] (3).

| Atom | Atom | Length/Å   | Atom | Atom | Length/Å  |
|------|------|------------|------|------|-----------|
| Hg1  | Br1  | 2.6504(14) | C6   | C7   | 1.396(19) |
| Hg1  | I1   | 2.6476(14) | C5   | C4   | 1.357(19) |
| Hg1  | N1   | 2.377(11)  | C1AA | C9   | 1.36(2)   |
| Hg1  | N2   | 2.387(10)  | C1   | C2   | 1.381(18) |
| Hg1  | I2   | 2.6504(14) | C9   | C8   | 1.38(2)   |
| Hg1  | Br2  | 2.6476(14) | C9   | C10  | 1.49(2)   |
| N1   | C6   | 1.338(16)  | C7   | C8   | 1.36(2)   |

| Atom | Atom | Length/Å  | Atom | Atom | Length/Å |
|------|------|-----------|------|------|----------|
| N1   | C1AA | 1.333(16) | C4   | C3   | 1.39(2)  |
| N2   | C5   | 1.348(16) | C11  | C2   | 1.49(2)  |
| N2   | C1   | 1.346(16) | C2   | C3   | 1.36(2)  |

**Table S15.** Bond Angles for [Hg(dmbpy)Br] (3).

| Atom | Atom | Atom | Angle/°   | Atom | Atom | Atom | Angle/°   |
|------|------|------|-----------|------|------|------|-----------|
| Br1  | Hg1  | I2   | 0.0       | C1   | N2   | C5   | 118.2(11) |
| I1   | Hg1  | Br1  | 130.17(5) | N1   | C6   | C5   | 118.2(11) |
| I1   | Hg1  | I2   | 130.17(5) | N1   | C6   | C7   | 118.8(13) |
| N1   | Hg1  | Br1  | 105.6(3)  | C7   | C6   | C5   | 123.0(12) |
| N1   | Hg1  | I1   | 114.1(3)  | N2   | C5   | C6   | 117.0(11) |
| N1   | Hg1  | N2   | 70.5(4)   | N2   | C5   | C4   | 120.8(12) |
| N1   | Hg1  | I2   | 105.6(3)  | C4   | C5   | C6   | 122.1(13) |
| N1   | Hg1  | Br2  | 114.1(3)  | N1   | C1AA | C9   | 125.0(15) |
| N2   | Hg1  | Br1  | 114.0(3)  | N2   | C1   | C2   | 124.0(13) |
| N2   | Hg1  | I1   | 106.9(2)  | C1AA | C9   | C8   | 115.8(14) |
| N2   | Hg1  | I2   | 114.0(3)  | C1AA | C9   | C10  | 122.8(16) |
| N2   | Hg1  | Br2  | 106.9(2)  | C8   | C9   | C10  | 121.2(15) |
| Br2  | Hg1  | Br1  | 130.17(5) | C8   | C7   | C6   | 120.4(14) |
| Br2  | Hg1  | I1   | 0.0       | C5   | C4   | C3   | 119.9(14) |
| Br2  | Hg1  | I2   | 130.17(5) | C7   | C8   | C9   | 120.5(14) |

**Table S16.** Atomic Occupancy for [Hg(dmbpy)Br] (3).

| Atom | Occupancy | Atom | Occupancy |
|------|-----------|------|-----------|
| Br2  | 0.50      | I1   | 0.50      |
| I2   | 0.50      | Br1  | 0.50      |

**Table S17.** Crystal data and structure refinement for [Hg(phen)Br] (4).

|                                                   |                                                               |
|---------------------------------------------------|---------------------------------------------------------------|
| <b>Identification code</b>                        | HgBrI(phen)                                                   |
| <b>Empirical formula</b>                          | C <sub>12</sub> H <sub>8</sub> BrHgI <sub>2</sub>             |
| <b>Formula weight</b>                             | 587.60                                                        |
| <b>Temperature/K</b>                              | 298.00                                                        |
| <b>Crystal system</b>                             | Triclinic                                                     |
| <b>Space group</b>                                | <i>P</i> -1                                                   |
| <b>a/Å</b>                                        | 7.8750(3)                                                     |
| <b>b/Å</b>                                        | 9.3730(4)                                                     |
| <b>c/Å</b>                                        | 9.8830(4)                                                     |
| <b>α/°</b>                                        | 91.545(3)                                                     |
| <b>β/°</b>                                        | 111.574(4)                                                    |
| <b>γ/°</b>                                        | 101.420(3)                                                    |
| <b>Volume/Å<sup>3</sup></b>                       | 660.96(5)                                                     |
| <b>Z</b>                                          | 2                                                             |
| <b>ρ<sub>calc</sub>/cm<sup>3</sup></b>            | 2.952                                                         |
| <b>μ/mm<sup>-1</sup></b>                          | 16.979                                                        |
| <b>F(000)</b>                                     | 524.0                                                         |
| <b>Crystal size/mm<sup>3</sup></b>                | 0.13 × 0.1 × 0.08                                             |
| <b>Radiation</b>                                  | MoKα (λ = 0.71073)                                            |
| <b>2θ range for data collection/°</b>             | 6.644 to 58.776                                               |
| <b>Index ranges</b>                               | -10 ≤ h ≤ 10, -12 ≤ k ≤ 12, -13 ≤ l ≤ 12                      |
| <b>Reflections collected</b>                      | 13761                                                         |
| <b>Independent reflections</b>                    | 3276 [R <sub>int</sub> = 0.1133, R <sub>sigma</sub> = 0.0858] |
| <b>Data/restraints/parameters</b>                 | 3276/0/154                                                    |
| <b>Goodness-of-fit on F<sup>2</sup></b>           | 0.875                                                         |
| <b>Final R indexes [I ≥ 2σ(I)]</b>                | R <sub>1</sub> = 0.0411, wR <sub>2</sub> = 0.0852             |
| <b>Final R indexes [all data]</b>                 | R <sub>1</sub> = 0.0745, wR <sub>2</sub> = 0.0924             |
| <b>Largest diff. peak/hole / e Å<sup>-3</sup></b> | 1.39/-1.69                                                    |

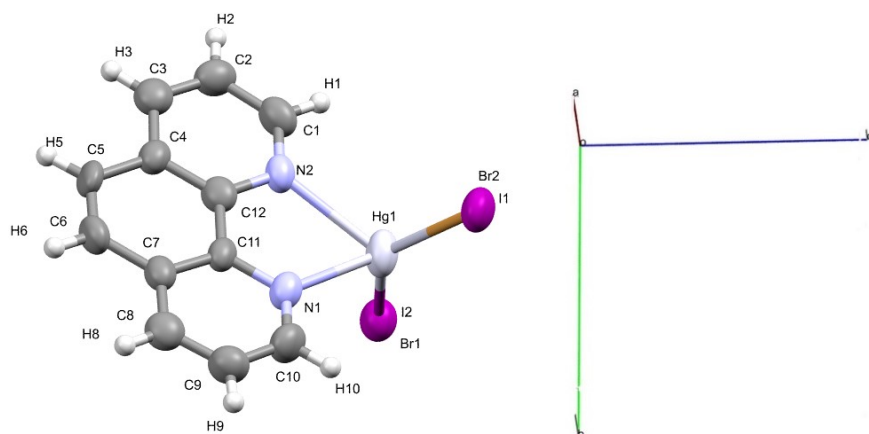

**Figure S18.** ORTEP plot of the asymmetric unit for [Hg(phen)BrI] (**4**) (*a* axis =red, *b* axis=green, *c* axis= blue).

**Table S18.** Atomic Occupancy for [Hg(phen)BrI] (**4**).

| Atom | Occupancy | Atom | Occupancy |
|------|-----------|------|-----------|
| I1   | 0.496(8)  | I1A  | 0.504(8)  |
| Br1A | 0.504(8)  | Br1  | 0.496(8)  |

**Table S19.** Bond Lengths for [Hg(phen)BrI] (**4**).

| Atom | Atom | Length/Å  | Atom | Atom | Length/Å  |
|------|------|-----------|------|------|-----------|
| Hg1  | I2   | 2.5952(6) | N1   | C10  | 1.304(9)  |
| Hg1  | I1   | 2.5832(7) | C11  | C7   | 1.406(10) |
| Hg1  | N2   | 2.425(6)  | C1   | C2   | 1.396(11) |
| Hg1  | N1   | 2.405(6)  | C4   | C3   | 1.416(10) |
| Hg1  | Br1  | 2.5952(6) | C4   | C5   | 1.445(10) |
| Hg1  | Br2  | 2.5832(7) | C7   | C6   | 1.431(10) |
| N2   | C12  | 1.365(9)  | C7   | C8   | 1.420(10) |
| N2   | C1   | 1.323(9)  | C2   | C3   | 1.351(12) |
| C12  | C11  | 1.430(9)  | C5   | C6   | 1.393(10) |
| C12  | C4   | 1.405(10) | C10  | C9   | 1.398(11) |
| N1   | C11  | 1.376(8)  | C9   | C8   | 1.356(11) |

**Table S20.** Bond Angles for [Hg(phen)BrI] (**4**).

| Atom | Atom | Atom | Angle/°    | Atom | Atom | Atom | Angle/°  |
|------|------|------|------------|------|------|------|----------|
| I2   | Hg1  | Br1  | 0.0        | C11  | N1   | Hg1  | 116.0(4) |
| I1   | Hg1  | I2   | 137.38(2)  | C10  | N1   | Hg1  | 126.8(5) |
| I1   | Hg1  | Br1  | 137.38(2)  | C10  | N1   | C11  | 117.2(6) |
| N2   | Hg1  | I2   | 101.00(12) | N1   | C11  | C12  | 119.0(6) |
| N2   | Hg1  | I1   | 114.25(12) | N1   | C11  | C7   | 122.2(6) |
| N2   | Hg1  | Br1  | 101.00(12) | C7   | C11  | C12  | 118.8(6) |
| N2   | Hg1  | Br2  | 114.25(12) | N2   | C1   | C2   | 122.5(7) |
| N1   | Hg1  | I2   | 111.83(12) | C12  | C4   | C3   | 118.8(7) |
| N1   | Hg1  | I1   | 102.68(13) | C12  | C4   | C5   | 120.8(6) |
| N1   | Hg1  | N2   | 69.64(19)  | C3   | C4   | C5   | 120.4(7) |
| N1   | Hg1  | Br1  | 111.83(12) | C11  | C7   | C6   | 121.1(7) |
| N1   | Hg1  | Br2  | 102.68(13) | C11  | C7   | C8   | 118.3(7) |
| Br2  | Hg1  | I2   | 137.38(2)  | C8   | C7   | C6   | 120.6(7) |
| Br2  | Hg1  | I1   | 0.0        | C3   | C2   | C1   | 120.4(7) |
| Br2  | Hg1  | Br1  | 137.38(2)  | C2   | C3   | C4   | 118.3(7) |
| C12  | N2   | Hg1  | 115.6(4)   | C6   | C5   | C4   | 118.7(6) |
| C1   | N2   | Hg1  | 125.0(5)   | N1   | C10  | C9   | 124.3(7) |
| C1   | N2   | C12  | 119.0(6)   | C5   | C6   | C7   | 120.4(7) |
| N2   | C12  | C11  | 119.0(6)   | C8   | C9   | C10  | 120.0(7) |
| N2   | C12  | C4   | 120.9(6)   | C9   | C8   | C7   | 117.9(8) |
| C4   | C12  | C11  | 120.1(6)   |      |      |      |          |

**Table S21.** Crystal data and structure refinement for [Hg(dmphen)Br] (5).

|                                             |                                                               |
|---------------------------------------------|---------------------------------------------------------------|
| Identification code                         | HgBrI(neo)                                                    |
| Empirical formula                           | C <sub>14</sub> H <sub>12</sub> BrHgIN <sub>2</sub>           |
| Formula weight                              | 615.66                                                        |
| Temperature/K                               | 298.00                                                        |
| Crystal system                              | monoclinic                                                    |
| Space group                                 | I2/a                                                          |
| a/Å                                         | 9.7192(10)                                                    |
| b/Å                                         | 11.4387(11)                                                   |
| c/Å                                         | 14.6753(18)                                                   |
| α/°                                         | 90                                                            |
| β/°                                         | 102.712(11)                                                   |
| γ/°                                         | 90                                                            |
| Volume/Å <sup>3</sup>                       | 1591.5(3)                                                     |
| Z                                           | 4                                                             |
| ρ <sub>calc</sub> /g cm <sup>-3</sup>       | 2.569                                                         |
| μ/mm <sup>-1</sup>                          | 14.109                                                        |
| F(000)                                      | 1112.0                                                        |
| Crystal size/mm <sup>3</sup>                | 0.13 × 0.11 × 0.1                                             |
| Radiation                                   | MoKα (λ = 0.71073)                                            |
| 2θ range for data collection/°              | 7.124 to 52.732                                               |
| Index ranges                                | -12 ≤ h ≤ 9, -14 ≤ k ≤ 10, -18 ≤ l ≤ 18                       |
| Reflections collected                       | 4047                                                          |
| Independent reflections                     | 1623 [R <sub>int</sub> = 0.0486, R <sub>sigma</sub> = 0.0629] |
| Data/restraints/parameters                  | 1623/0/88                                                     |
| Goodness-of-fit on F <sup>2</sup>           | 1.021                                                         |
| Final R indexes [I > 2σ (I)]                | R <sub>1</sub> = 0.0431, wR <sub>2</sub> = 0.0807             |
| Final R indexes [all data]                  | R <sub>1</sub> = 0.0754, wR <sub>2</sub> = 0.0964             |
| Largest diff. peak/hole / e Å <sup>-3</sup> | 1.06/-0.87                                                    |

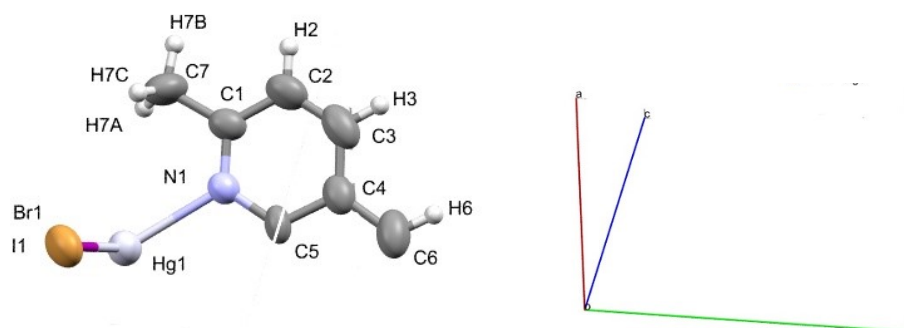

**Figure S19.** ORTEP plot of the asymmetric unit for [Hg(dmphen)Br] (5) (*a* axis = red, *b* axis = green, *c* axis = blue).

**Table S22.** Atomic Occupancy for [Hg(dmphen)Br] (5).

| Atom | Occupancy |
|------|-----------|
| I1   | 0.50      |
| Br1  | 0.50      |

**Table S23.** Bond Lengths for [Hg(dmphen)Br] (5).

| Atom | Atom             | Length/Å  | Atom | Atom            | Length/Å  |
|------|------------------|-----------|------|-----------------|-----------|
| Hg1  | I1               | 2.6033(9) | C1   | C7              | 1.507(14) |
| Hg1  | N1 <sup>1</sup>  | 2.408(7)  | C5   | C5 <sup>1</sup> | 1.404(17) |
| Hg1  | N1               | 2.408(7)  | C5   | C4              | 1.419(12) |
| Hg1  | Br1              | 2.6033(9) | C2   | C3              | 1.352(14) |
| Hg1  | Br1 <sup>1</sup> | 2.6034(9) | C3   | C4              | 1.410(14) |
| N1   | C1               | 1.325(11) | C4   | C6              | 1.408(13) |
| N1   | C5               | 1.371(10) | C6   | C6 <sup>1</sup> | 1.34(2)   |
| C1   | C2               | 1.407(14) |      |                 |           |

<sup>1</sup> = 3/2 - X, +Y, 1 - Z

**Table S24.** Bond Angles for [Hg(dmphen)Br] (5).

| Atom            | Atom | Atom             | Angle/°    | Atom            | Atom | Atom            | Angle/°   |
|-----------------|------|------------------|------------|-----------------|------|-----------------|-----------|
| I1              | Hg1  | Br1 <sup>1</sup> | 136.57(5)  | N1              | C1   | C2              | 121.5(9)  |
| I1              | Hg1  | Br1              | 0.0        | N1              | C1   | C7              | 116.5(8)  |
| N1 <sup>1</sup> | Hg1  | I1               | 104.57(17) | C2              | C1   | C7              | 122.0(9)  |
| N1              | Hg1  | I1               | 110.74(16) | N1              | C5   | C5 <sup>1</sup> | 119.8(5)  |
| N1              | Hg1  | N1 <sup>1</sup>  | 70.1(3)    | N1              | C5   | C4              | 120.4(8)  |
| N11             | Hg1  | Br1              | 104.57(17) | C5 <sup>1</sup> | C5   | C4              | 119.8(5)  |
| N1              | Hg1  | Br1 <sup>1</sup> | 104.57(17) | C3              | C2   | C1              | 119.0(10) |
| N11             | Hg1  | Br1 <sup>1</sup> | 110.75(16) | C2              | C3   | C4              | 121.3(9)  |
| N1              | Hg1  | Br1              | 110.74(16) | C3              | C4   | C5              | 117.0(9)  |
| Br1             | Hg1  | Br1 <sup>1</sup> | 136.57(5)  | C6              | C4   | C5              | 118.5(9)  |
| C1              | N1   | Hg1              | 124.1(6)   | C6              | C4   | C3              | 124.5(9)  |
| C1              | N1   | C5               | 120.8(7)   | C6 <sup>1</sup> | C6   | C4              | 121.7(6)  |
| C5              | N1   | Hg1              | 115.1(5)   |                 |      |                 |           |

<sup>1</sup>= 3/2-X,+Y,1-Z**Table S25.** Crystal data and structure refinement for [Hg(terpy)Br] (6).

|                                             |                                                               |
|---------------------------------------------|---------------------------------------------------------------|
| Identification code                         | HgBrI(terpy)                                                  |
| Empirical formula                           | C <sub>15</sub> H <sub>11</sub> BrHgI <sub>3</sub>            |
| Formula weight                              | 640.67                                                        |
| Temperature/K                               | 298.00                                                        |
| Crystal system                              | monoclinic                                                    |
| Space group                                 | I2/a                                                          |
| a/Å                                         | 14.2230(7)                                                    |
| b/Å                                         | 9.7175(3)                                                     |
| c/Å                                         | 11.9627(5)                                                    |
| α/°                                         | 90                                                            |
| β/°                                         | 95.902(4)                                                     |
| γ/°                                         | 90                                                            |
| Volume/Å <sup>3</sup>                       | 1644.61(12)                                                   |
| Z                                           | 4                                                             |
| ρ <sub>calc</sub> /g cm <sup>-3</sup>       | 2.587                                                         |
| μ/mm <sup>-1</sup>                          | 13.661                                                        |
| F(000)                                      | 1160.0                                                        |
| Crystal size/mm <sup>3</sup>                | 0.12 × 0.11 × 0.08                                            |
| Radiation                                   | MoKα (λ = 0.71073)                                            |
| 2θ range for data collection/°              | 6.848 to 52.744                                               |
| Index ranges                                | -17 ≤ h ≤ 17, -12 ≤ k ≤ 12, -14 ≤ l ≤ 13                      |
| Reflections collected                       | 7813                                                          |
| Independent reflections                     | 1684 [R <sub>int</sub> = 0.0403, R <sub>sigma</sub> = 0.0277] |
| Data/restraints/parameters                  | 1684/0/97                                                     |
| Goodness-of-fit on F <sup>2</sup>           | 1.050                                                         |
| Final R indexes [I ≥ 2σ(I)]                 | R <sub>1</sub> = 0.0303, wR <sub>2</sub> = 0.0692             |
| Final R indexes [all data]                  | R <sub>1</sub> = 0.0365, wR <sub>2</sub> = 0.0725             |
| Largest diff. peak/hole / e Å <sup>-3</sup> | 1.16/-0.75                                                    |

**Table S26.** Atomic Occupancy for [Hg(terpy)Br] (6).

| Atom | Occupancy |
|------|-----------|
| I2   | 0.50      |
| Br1  | 0.50      |

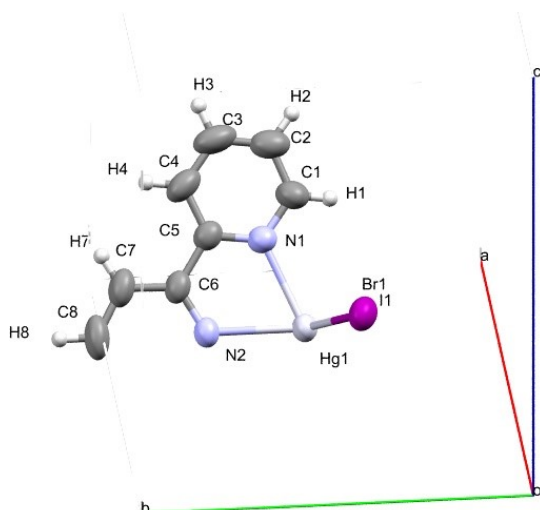

Figure S20. ORTEP plot of the asymmetric unit for [Hg(terpy)BrI] (**6**) (*a* axis =red, *b* axis=green, *c* axis= blue).

Table S27. Bond Lengths for [Hg(terpy)BrI] (**6**).

| Atom | Atom            | Length/Å  | Atom | Atom            | Length/Å  |
|------|-----------------|-----------|------|-----------------|-----------|
| Hg1  | I1 <sup>1</sup> | 2.6583(6) | N2   | C6 <sup>1</sup> | 1.331(7)  |
| Hg1  | I1              | 2.6583(6) | C5   | C6              | 1.485(9)  |
| Hg1  | N1              | 2.430(5)  | C5   | C4              | 1.380(8)  |
| Hg1  | N1 <sup>1</sup> | 2.430(5)  | C6   | C7              | 1.391(8)  |
| Hg1  | N2              | 2.439(7)  | C2   | C1              | 1.373(11) |
| Hg1  | Br1             | 2.6583(6) | C2   | C3              | 1.370(12) |
| N1   | C5              | 1.349(8)  | C4   | C3              | 1.384(11) |
| N1   | C1              | 1.340(9)  | C7   | C8              | 1.376(9)  |
| N2   | C6              | 1.331(7)  |      |                 |           |

<sup>1</sup>= 3/2-X,+Y,-Z

Table S28. Bond Angles for [Hg(terpy)BrI] (**6**).

| Atom            | Atom | Atom            | Angle/°     | Atom            | Atom | Atom            | Angle/°   |
|-----------------|------|-----------------|-------------|-----------------|------|-----------------|-----------|
| I1              | Hg1  | I1 <sup>1</sup> | 122.60(3)   | C1              | N1   | C5              | 120.3(6)  |
| I1              | Hg1  | Br1             | 0.0         | C6 <sup>1</sup> | N2   | Hg1             | 119.5(4)  |
| N1 <sup>1</sup> | Hg1  | I1              | 101.87(12)  | C6              | N2   | Hg1             | 119.5(4)  |
| N1              | Hg1  | I1 <sup>1</sup> | 101.87(12)  | C6              | N2   | C6 <sup>1</sup> | 121.0(8)  |
| N1 <sup>1</sup> | Hg1  | I1 <sup>1</sup> | 99.44(12)   | N1              | C5   | C6              | 116.8(5)  |
| N1              | Hg1  | I1              | 99.43(12)   | N1              | C5   | C4              | 119.7(6)  |
| N1              | Hg1  | N1 <sup>1</sup> | 134.7(3)    | C4              | C5   | C6              | 123.5(6)  |
| N1              | Hg1  | N2              | 67.37(13)   | N2              | C6   | C5              | 117.1(5)  |
| N1 <sup>1</sup> | Hg1  | N2              | 67.36(13)   | N2              | C6   | C7              | 121.1(7)  |
| N1              | Hg1  | Br1             | 99.43(12)   | C7              | C6   | C5              | 121.8(6)  |
| N1 <sup>1</sup> | Hg1  | Br1             | 101.87(12)  | C3              | C2   | C1              | 118.3(8)  |
| N2              | Hg1  | I1 <sup>1</sup> | 118.699(14) | N1              | C1   | C2              | 122.1(7)  |
| N2              | Hg1  | I1              | 118.699(14) | C5              | C4   | C3              | 119.8(7)  |
| N2              | Hg1  | Br1             | 118.699(14) | C8              | C7   | C6              | 117.8(8)  |
| Br1             | Hg1  | I1 <sup>1</sup> | 122.60(3)   | C7 <sup>1</sup> | C8   | C7              | 121.2(10) |
| C5              | N1   | Hg1             | 119.3(4)    | C2              | C3   | C4              | 119.8(7)  |
| C1              | N1   | Hg1             | 120.4(5)    |                 |      |                 |           |

<sup>1</sup>=3/2-X,+Y,-Z

Table S29. Crystal data and structure refinement for [Hg<sub>2</sub>(bpym)Br<sub>2</sub>I<sub>2</sub>] (**7**).

|                     |                                                                                             |
|---------------------|---------------------------------------------------------------------------------------------|
| Identification code | (HgBrI) <sub>2</sub> (bpym)                                                                 |
| Empirical formula   | C <sub>8</sub> H <sub>6</sub> Br <sub>2</sub> Hg <sub>2</sub> I <sub>2</sub> N <sub>4</sub> |
| Formula weight      | 972.97                                                                                      |
| Temperature/K       | 298.00                                                                                      |
| Crystal system      | monoclinic                                                                                  |

|                                             |                                       |
|---------------------------------------------|---------------------------------------|
| Space group                                 | P21/c                                 |
| a/Å                                         | 7.4986(9)                             |
| b/Å                                         | 13.7515(12)                           |
| c/Å                                         | 8.5348(8)                             |
| $\alpha$ /°                                 | 90                                    |
| $\beta$ /°                                  | 93.782(10)                            |
| $\gamma$ /°                                 | 90                                    |
| Volume/Å <sup>3</sup>                       | 878.17(15)                            |
| Z                                           | 2                                     |
| $\rho$ calc/g cm <sup>-3</sup>              | 3.680                                 |
| $\mu$ /mm <sup>-1</sup>                     | 25.515                                |
| F(000)                                      | 836.0                                 |
| Crystal size/mm <sup>3</sup>                | 0.11 × 0.08 × 0.05                    |
| Radiation                                   | MoK $\alpha$ ( $\lambda$ = 0.71073)   |
| 2 $\theta$ range for data collection/°      | 7.61 to 52.74                         |
| Index ranges                                | -9 ≤ h ≤ 9, -17 ≤ k ≤ 17, -9 ≤ l ≤ 10 |
| Reflections collected                       | 5983                                  |
| Independent reflections                     | 1795 [Rint = 0.0520, Rsigma = 0.0522] |
| Data/restraints/parameters                  | 1795/0/82                             |
| Goodness-of-fit on F <sup>2</sup>           | 1.066                                 |
| Final R indexes [ $I > 2\sigma(I)$ ]        | R1 = 0.0599, wR2 = 0.1667             |
| Final R indexes [all data]                  | R1 = 0.0932, wR2 = 0.2066             |
| Largest diff. peak/hole / e Å <sup>-3</sup> | 2.67/-1.64                            |

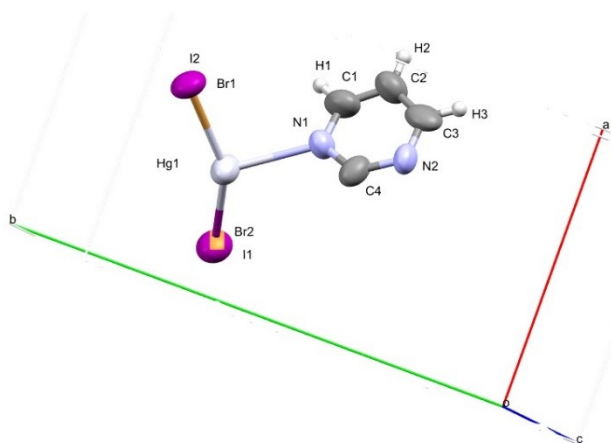

Figure S21. ORTEP plot of the asymmetric unit for [Hg(bpym)BrI]<sub>2</sub> (7).

Table S30. Atomic Occupancy for [Hg<sub>2</sub>(bpym)Br<sub>2</sub>I<sub>2</sub>] (7).

| Atom | Occupancy | Atom | Occupancy |
|------|-----------|------|-----------|
| I1   | 0.50      | Br2  | 0.50      |
| I2   | 0.50      | Br1  | 0.50      |

Table S31. Bond Lengths for [Hg<sub>2</sub>(bpym)Br<sub>2</sub>I<sub>2</sub>] (7).

| Atom | Atom            | Length/Å   | Atom | Atom            | Length/Å |
|------|-----------------|------------|------|-----------------|----------|
| Hg1  | Br1             | 2.6100(15) | N1   | C4              | 1.36(2)  |
| Hg1  | I1              | 2.5449(18) | C1   | C2              | 1.31(3)  |
| Hg1  | N1              | 2.537(13)  | N2   | C4              | 1.33(2)  |
| Hg1  | N2 <sup>1</sup> | 2.595(14)  | N2   | C3              | 1.33(3)  |
| Hg1  | I2              | 2.6100(15) | C4   | C4 <sup>1</sup> | 1.49(4)  |
| Hg1  | Br2             | 2.5449(18) | C3   | C2              | 1.40(3)  |
| N1   | C1              | 1.32(2)    |      |                 |          |

<sup>1</sup> = 1-X, 1-Y, 1-Z

**Table S32.** Bond Angles for [Hg<sub>2</sub>(bpym)Br<sub>2</sub>I<sub>2</sub>] (7).

| Atom            | Atom | Atom            | Angle/°   | Atom | Atom | Atom             | Angle/°   |
|-----------------|------|-----------------|-----------|------|------|------------------|-----------|
| I1              | Hg1  | Br1             | 150.24(6) | Br2  | Hg1  | I2               | 150.24(6) |
| I1              | Hg1  | N2 <sup>1</sup> | 90.0(3)   | C1   | N1   | Hg1              | 123.7(13) |
| I1              | Hg1  | I2              | 150.24(6) | C1   | N1   | C4               | 116.8(16) |
| N1              | Hg1  | Br1             | 96.6(3)   | C4   | N1   | Hg1              | 119.4(12) |
| N1              | Hg1  | I1              | 109.5(3)  | C2   | C1   | N1               | 125(2)    |
| N1              | Hg1  | N2 <sup>1</sup> | 65.6(5)   | C4   | N2   | Hg1 <sup>1</sup> | 117.4(12) |
| N1              | Hg1  | I2              | 96.6(3)   | C3   | N2   | Hg1 <sup>1</sup> | 124.9(13) |
| N1              | Hg1  | Br2             | 109.5(3)  | C3   | N2   | C4               | 117.7(16) |
| N2 <sup>1</sup> | Hg1  | Br1             | 114.4(3)  | N1   | C4   | C4 <sup>1</sup>  | 117.6(19) |
| N2 <sup>1</sup> | Hg1  | I2              | 114.4(3)  | N2   | C4   | N1               | 122.5(17) |
| I2              | Hg1  | Br1             | 0.0       | N2   | C4   | C4 <sup>1</sup>  | 119.9(17) |
| Br2             | Hg1  | Br1             | 150.24(6) | N2   | C3   | C2               | 122(2)    |
| Br2             | Hg1  | I1              | 0.0       | C1   | C2   | C3               | 115(2)    |
| Br2             | Hg1  | N2 <sup>1</sup> | 90.0(3)   |      |      |                  |           |

<sup>1</sup> = 1-X,1-Y,1-Z

**Table S33.** Crystal data and structure refinement for [Hg(pyNP)Br] (8).

|                                                              |                                                             |
|--------------------------------------------------------------|-------------------------------------------------------------|
| Identification code                                          | HgBrI(pyNP)(centro)                                         |
| Empirical formula                                            | C13H9BrHgIN3                                                |
| Formula weight                                               | 614.63                                                      |
| Temperature/K                                                | 298.00                                                      |
| Crystal system                                               | Triclinic                                                   |
| Space group                                                  | <i>P</i> -1                                                 |
| <i>a</i> /Å                                                  | 7.88287(18)                                                 |
| <i>b</i> /Å                                                  | 8.4128(2)                                                   |
| <i>c</i> /Å                                                  | 12.8356(4)                                                  |
| $\alpha$ /°                                                  | 76.521(2)                                                   |
| $\beta$ /°                                                   | 88.160(2)                                                   |
| $\gamma$ /°                                                  | 64.590(2)                                                   |
| Volume/Å <sup>3</sup>                                        | 745.46(4)                                                   |
| <i>Z</i>                                                     | 2                                                           |
| $\rho$ calc/g cm <sup>-3</sup>                               | 2.738                                                       |
| $\mu$ /mm <sup>-1</sup>                                      | 15.063                                                      |
| <i>F</i> (000)                                               | 552.0                                                       |
| Crystal size/mm <sup>3</sup>                                 | 0.15 × 0.12 × 0.11                                          |
| Radiation                                                    | MoK $\alpha$ ( $\lambda$ = 0.71073)                         |
| 2 $\theta$ range for data collection/°                       | 6.388 to 52.742                                             |
| Index ranges                                                 | -9 ≤ <i>h</i> ≤ 9, -10 ≤ <i>k</i> ≤ 10, -16 ≤ <i>l</i> ≤ 16 |
| Reflections collected                                        | 29565                                                       |
| Independent reflections                                      | 3028 [Rint = 0.0583, Rsigma = 0.0254]                       |
| Data/restraints/parameters                                   | 3028/0/172                                                  |
| Goodness-of-fit on <i>F</i> <sup>2</sup>                     | 1.041                                                       |
| Final <i>R</i> indexes [ <i>I</i> ≥ 2 $\sigma$ ( <i>I</i> )] | R1 = 0.0322, wR2 = 0.0756                                   |
| Final <i>R</i> indexes [all data]                            | R1 = 0.0421, wR2 = 0.0807                                   |
| Largest diff. peak/hole / e Å <sup>-3</sup>                  | 0.87/-0.99                                                  |



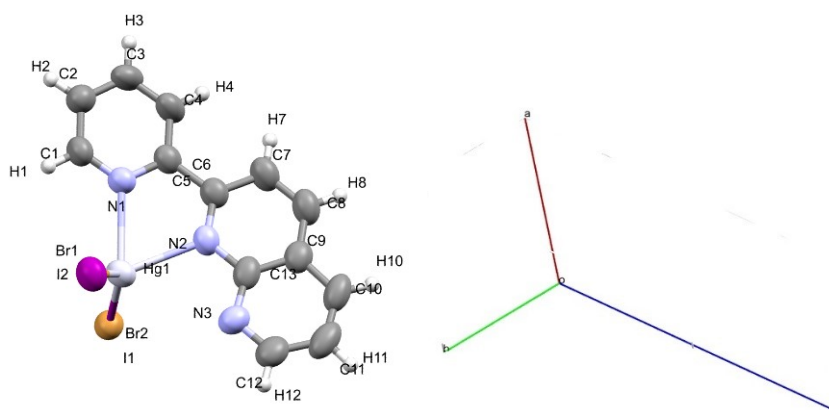

**Figure C22.** ORTEP plot of the asymmetric unit for [Hg(pyNP)BrI] (**8**) *a* axis =red, *b* axis=green, *c* axis= blue.

**Table S34.** Atomic Occupancy for [Hg(pyNP)BrI] (**8**).

| Atom | Occupancy | Atom | Occupancy |
|------|-----------|------|-----------|
| I2   | 0.577(9)  | Br2  | 0.599(9)  |
| I1   | 0.401(9)  | Br1  | 0.423(9)  |

**Table S35.** Bond Lengths for [Hg(pyNP)BrI] (**8**).

| Atom | Atom | Length/Å  | Atom | Atom | Length/Å  |
|------|------|-----------|------|------|-----------|
| Hg1  | I1   | 2.5978(6) | C6   | C5   | 1.494(10) |
| Hg1  | I2   | 2.5743(6) | C6   | C7   | 1.417(10) |
| Hg1  | N2   | 2.377(5)  | C5   | C4   | 1.376(10) |
| Hg1  | N1   | 2.447(5)  | C9   | C13  | 1.417(10) |
| Hg1  | Br1  | 2.5743(6) | C9   | C8   | 1.389(11) |
| Hg1  | Br2  | 2.5978(6) | C9   | C10  | 1.396(11) |
| N2   | C6   | 1.319(8)  | C1   | C2   | 1.387(10) |
| N2   | C13  | 1.361(9)  | C8   | C7   | 1.380(11) |
| N1   | C5   | 1.345(8)  | C3   | C2   | 1.357(11) |
| N1   | C1   | 1.322(9)  | C3   | C4   | 1.365(11) |
| N3   | C13  | 1.349(9)  | C12  | C11  | 1.410(12) |
| N3   | C12  | 1.301(10) | C10  | C11  | 1.357(13) |

**Table S36.** Bond Angles for [Hg(pyNP)BrI] (**8**).

| Atom | Atom | Atom | Angle/°    | Atom | Atom | Atom | Angle/°  |
|------|------|------|------------|------|------|------|----------|
| I2   | Hg1  | I1   | 140.79(2)  | N2   | C6   | C5   | 116.6(6) |
| I2   | Hg1  | Br2  | 140.79(2)  | N2   | C6   | C7   | 121.7(7) |
| N2   | Hg1  | I1   | 102.87(12) | C7   | C6   | C5   | 121.6(6) |
| N2   | Hg1  | I2   | 110.98(12) | N1   | C5   | C6   | 116.5(6) |
| N2   | Hg1  | N1   | 67.68(19)  | N1   | C5   | C4   | 120.1(7) |
| N2   | Hg1  | Br1  | 110.98(12) | C4   | C5   | C6   | 123.2(6) |
| N2   | Hg1  | Br2  | 102.87(12) | C8   | C9   | C13  | 117.9(7) |
| N1   | Hg1  | I1   | 109.57(13) | C8   | C9   | C10  | 125.2(8) |
| N1   | Hg1  | I2   | 101.34(12) | C10  | C9   | C13  | 116.9(7) |
| N1   | Hg1  | Br1  | 101.34(12) | N1   | C1   | C2   | 123.0(7) |
| N1   | Hg1  | Br2  | 109.57(13) | N2   | C13  | C9   | 120.9(7) |
| Br1  | Hg1  | I1   | 140.79(2)  | N3   | C13  | N2   | 115.3(6) |
| Br1  | Hg1  | I2   | 0.0        | N3   | C13  | C9   | 123.8(7) |
| Br1  | Hg1  | Br2  | 140.79(2)  | C7   | C8   | C9   | 120.7(7) |
| Br2  | Hg1  | I1   | 0.0        | C2   | C3   | C4   | 118.8(7) |
| C6   | N2   | Hg1  | 120.6(5)   | C8   | C7   | C6   | 118.3(7) |
| C6   | N2   | C13  | 120.6(6)   | C3   | C2   | C1   | 118.3(7) |
| C13  | N2   | Hg1  | 118.4(5)   | N3   | C12  | C11  | 125.0(8) |
| C5   | N1   | Hg1  | 117.3(4)   | C3   | C4   | C5   | 121.0(7) |
| C1   | N1   | Hg1  | 123.9(4)   | C11  | C10  | C9   | 119.7(8) |
| C1   | N1   | C5   | 118.8(6)   | C10  | C11  | C12  | 118.2(8) |
| C12  | N3   | C13  | 116.4(7)   |      |      |      |          |

**Table S37.** Crystal data and structure refinement for [Hg(phen)Br<sub>2</sub>] (9).

|                                                              |                                                                              |
|--------------------------------------------------------------|------------------------------------------------------------------------------|
| Empirical formula                                            | C <sub>12</sub> H <sub>8</sub> Br <sub>2</sub> HgN <sub>2</sub>              |
| Formula weight                                               | 540.61                                                                       |
| Temperature/K                                                | 293(2)                                                                       |
| Crystal system                                               | Triclinic                                                                    |
| Space group                                                  | <i>P</i> -1                                                                  |
| <i>a</i> /Å                                                  | 7.885(4)                                                                     |
| <i>b</i> /Å                                                  | 9.159(4)                                                                     |
| <i>c</i> /Å                                                  | 9.703(2)                                                                     |
| $\alpha$ /°                                                  | 92.36(3)                                                                     |
| $\beta$ /°                                                   | 112.06(4)                                                                    |
| $\gamma$ /°                                                  | 101.02(4)                                                                    |
| Volume/Å <sup>3</sup>                                        | 632.6(5)                                                                     |
| <i>Z</i>                                                     | 2                                                                            |
| $\rho_{\text{calc}}/\text{g cm}^{-3}$                        | 2.838                                                                        |
| $\mu/\text{mm}^{-1}$                                         | 18.459                                                                       |
| <i>F</i> (000)                                               | 488.0                                                                        |
| Crystal size/mm <sup>3</sup>                                 | 0.13 × 0.08 × 0.04                                                           |
| Radiation                                                    | MoK $\alpha$ ( $\lambda$ = 0.71073)                                          |
| 2 $\theta$ range for data collection/°                       | 6.474 to 52.744                                                              |
| Index ranges                                                 | -9 ≤ <i>h</i> ≤ 9, -11 ≤ <i>k</i> ≤ 9, -11 ≤ <i>l</i> ≤ 12                   |
| Reflections collected                                        | 4931                                                                         |
| Independent reflections                                      | 2581 [ <i>R</i> <sub>int</sub> = 0.0805, <i>R</i> <sub>sigma</sub> = 0.2889] |
| Data/restraints/parameters                                   | 2581/212/154                                                                 |
| Goodness-of-fit on <i>F</i> <sup>2</sup>                     | 1.018                                                                        |
| Final <i>R</i> indexes [ <i>I</i> > 2 $\sigma$ ( <i>I</i> )] | <i>R</i> <sub>1</sub> = 0.0518, <i>wR</i> <sub>2</sub> = 0.1079              |
| Final <i>R</i> indexes [all data]                            | <i>R</i> <sub>1</sub> = 0.0852, <i>wR</i> <sub>2</sub> = 0.1137              |
| Largest diff. peak/hole / e Å <sup>-3</sup>                  | 4.24/-2.48                                                                   |

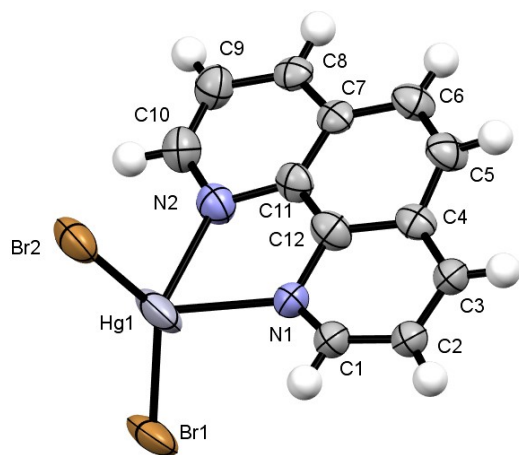**Figure S23.** ORTEP plot of the asymmetric unit for [Hg(phen)Br<sub>2</sub>] (9).**Table S38.** Bond Lengths for [Hg(phen)Br<sub>2</sub>] (9).

| Atom | Atom | Length/Å | Atom | Atom | Length/Å  |
|------|------|----------|------|------|-----------|
| Hg1  | Br2  | 2.512(5) | C11  | C12  | 1.32(4)   |
| Hg1  | Br1  | 2.477(4) | C11  | C7   | 1.385(19) |
| Hg1  | N2   | 2.40(3)  | C12  | C4   | 1.51(5)   |
| Hg1  | N1   | 2.33(3)  | C8   | C7   | 1.35(4)   |
| N2   | C10  | 1.38(4)  | C8   | C9   | 1.46(5)   |
| N2   | C11  | 1.46(4)  | C3   | C4   | 1.372(18) |
| N1   | C1   | 1.18(3)  | C3   | C2   | 1.337(19) |
| N1   | C12  | 1.43(4)  | C4   | C5   | 1.37(5)   |
| C10  | C9   | 1.29(5)  | C7   | C6   | 1.392(19) |
| C1   | C2   | 1.39(5)  | C6   | C5   | 1.344(18) |

**Table S39.** Bond Angles for [Hg(phen)Br<sub>2</sub>] (9).

| Atom | Atom | Atom | Angle/°    | Atom | Atom | Atom | Angle/° |
|------|------|------|------------|------|------|------|---------|
| Br1  | Hg1  | Br2  | 137.08(17) | C7   | C11  | N2   | 124(3)  |
| N2   | Hg1  | Br2  | 101.9(7)   | N1   | C12  | C4   | 117(3)  |
| N2   | Hg1  | Br1  | 114.2(7)   | C11  | C12  | N1   | 119(4)  |
| N1   | Hg1  | Br2  | 111.1(6)   | C11  | C12  | C4   | 123(3)  |
| N1   | Hg1  | Br1  | 102.9(6)   | C7   | C8   | C9   | 128(3)  |
| N1   | Hg1  | N2   | 69.8(10)   | C2   | C3   | C4   | 118(3)  |
| C10  | N2   | Hg1  | 130(3)     | C3   | C4   | C12  | 120(3)  |
| C10  | N2   | C11  | 115(3)     | C5   | C4   | C12  | 112(3)  |
| C11  | N2   | Hg1  | 113.8(19)  | C5   | C4   | C3   | 127(3)  |
| C1   | N1   | Hg1  | 131(3)     | C11  | C7   | C6   | 123(3)  |
| C1   | N1   | C12  | 112(3)     | C8   | C7   | C11  | 112(3)  |
| C12  | N1   | Hg1  | 117(2)     | C8   | C7   | C6   | 125(3)  |
| C9   | C10  | N2   | 126(4)     | C5   | C6   | C7   | 117(3)  |
| N1   | C1   | C2   | 137(4)     | C3   | C2   | C1   | 115(3)  |
| C12  | C11  | N2   | 118(3)     | C10  | C9   | C8   | 114(4)  |
| C12  | C11  | C7   | 118(3)     | C6   | C5   | C4   | 126(3)  |

**Table S40.** Crystal data and structure refinement for [Hg(terpy)Br<sub>2</sub>] (10).

|                                                   |                                                                  |
|---------------------------------------------------|------------------------------------------------------------------|
| <b>Empirical formula</b>                          | C <sub>15</sub> H <sub>11</sub> Br <sub>2</sub> HgN <sub>3</sub> |
| <b>Formula weight</b>                             | 593.68                                                           |
| <b>Temperature/K</b>                              | 293                                                              |
| <b>Crystal system</b>                             | Monoclinic                                                       |
| <b>Space group</b>                                | I2/a                                                             |
| <b>a/Å</b>                                        | 11.7090(6)                                                       |
| <b>b/Å</b>                                        | 9.5059(5)                                                        |
| <b>c/Å</b>                                        | 13.9720(10)                                                      |
| <b>α/°</b>                                        | 90                                                               |
| <b>β/°</b>                                        | 95.422(6)                                                        |
| <b>γ/°</b>                                        | 90                                                               |
| <b>Volume/Å<sup>3</sup></b>                       | 1548.19(16)                                                      |
| <b>Z</b>                                          | 4                                                                |
| <b>ρ<sub>calc</sub>/g cm<sup>-3</sup></b>         | 2.547                                                            |
| <b>μ/mm<sup>-1</sup></b>                          | 15.098                                                           |
| <b>F(000)</b>                                     | 1088.0                                                           |
| <b>Crystal size/mm<sup>3</sup></b>                | 0.31 × 0.15 × 0.12                                               |
| <b>Radiation</b>                                  | MoKα (λ = 0.71073)                                               |
| <b>2θ range for data collection/°</b>             | 6.992 to 52.734                                                  |
| <b>Index ranges</b>                               | -14 ≤ h ≤ 14, -11 ≤ k ≤ 11, -17 ≤ l ≤ 17                         |
| <b>Reflections collected</b>                      | 8803                                                             |
| <b>Independent reflections</b>                    | 1587 [R <sub>int</sub> = 0.0410, R <sub>sigma</sub> = 0.0271]    |
| <b>Data/restraints/parameters</b>                 | 1587/0/97                                                        |
| <b>Goodness-of-fit on F<sup>2</sup></b>           | 1.072                                                            |
| <b>Final R indexes [I &gt; 2σ (I)]</b>            | R <sub>1</sub> = 0.0203, wR <sub>2</sub> = 0.0459                |
| <b>Final R indexes [all data]</b>                 | R <sub>1</sub> = 0.0235, wR <sub>2</sub> = 0.0473                |
| <b>Largest diff. peak/hole / e Å<sup>-3</sup></b> | 0.58/-0.84                                                       |

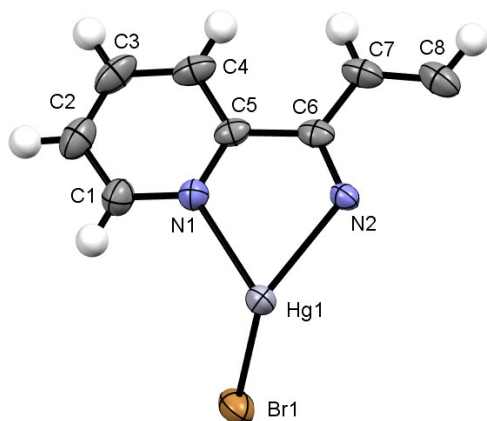

Figure S24. ORTEP plot of the asymmetric unit for [Hg(terpy)Br<sub>2</sub>] (10).

Table S41. Bond Lengths for [Hg(terpy)Br<sub>2</sub>] (10).

| Atom | Atom             | Length/Å  | Atom | Atom | Length/Å |
|------|------------------|-----------|------|------|----------|
| Hg1  | Br1              | 2.5557(5) | N1   | C1   | 1.334(5) |
| Hg1  | Br1 <sup>1</sup> | 2.5558(5) | C6   | C7   | 1.378(5) |
| Hg1  | N1               | 2.404(3)  | C6   | N2   | 1.332(4) |
| Hg1  | N1 <sup>1</sup>  | 2.404(3)  | C1   | C2   | 1.371(6) |
| Hg1  | N2               | 2.415(4)  | C4   | C3   | 1.392(6) |
| C5   | N1               | 1.345(5)  | C2   | C3   | 1.362(7) |
| C5   | C6               | 1.487(5)  | C7   | C8   | 1.374(5) |
| C5   | C4               | 1.396(5)  |      |      |          |

<sup>1</sup>3/2-X,+Y,1-Z

Table S42. Bond Angles for [Hg(terpy)Br<sub>2</sub>] (10).

| Atom            | Atom | Atom             | Angle/°     | Atom            | Atom | Atom            | Angle/°  |
|-----------------|------|------------------|-------------|-----------------|------|-----------------|----------|
| Br1             | Hg1  | Br1 <sup>1</sup> | 122.08(2)   | C1              | N1   | Hg1             | 120.9(3) |
| N1 <sup>1</sup> | Hg1  | Br1 <sup>1</sup> | 101.89(8)   | C1              | N1   | C5              | 119.6(3) |
| N1 <sup>1</sup> | Hg1  | Br1              | 99.31(7)    | C7              | C6   | C5              | 122.7(3) |
| N1              | Hg1  | Br1              | 101.89(8)   | N2              | C6   | C5              | 116.3(3) |
| N1              | Hg1  | Br1 <sup>1</sup> | 99.31(7)    | N2              | C6   | C7              | 121.0(4) |
| N1              | Hg1  | N1 <sup>1</sup>  | 135.35(15)  | N1              | C1   | C2              | 122.7(4) |
| N1 <sup>1</sup> | Hg1  | N2               | 67.67(7)    | C3              | C4   | C5              | 119.1(4) |
| N1              | Hg1  | N2               | 67.67(8)    | C3              | C2   | C1              | 118.8(4) |
| N2              | Hg1  | Br1 <sup>1</sup> | 118.958(11) | C8              | C7   | C6              | 119.2(4) |
| N2              | Hg1  | Br1              | 118.959(12) | C7 <sup>1</sup> | C8   | C7              | 119.2(6) |
| N1              | C5   | C6               | 116.8(3)    | C2              | C3   | C4              | 119.5(4) |
| N1              | C5   | C4               | 120.2(4)    | C6 <sup>1</sup> | N2   | Hg1             | 119.8(2) |
| C4              | C5   | C6               | 123.0(4)    | C6              | N2   | Hg1             | 119.8(2) |
| C5              | N1   | Hg1              | 119.5(2)    | C6              | N2   | C6 <sup>1</sup> | 120.4(5) |

<sup>1</sup> = 3/2-X,+Y,1-Z
